# Supplementary material for: A highly active catalytic system for Suzuki–Miyaura cross-coupling reactions of aryl and heteroaryl chlorides in water
Source: Royal Society of Chemistry journal article supplement (doi:10.1039/c2ob26463c), 2012-01-01
Supplement: c2ob26463c.pdf [file c2ob26463c.pdf]

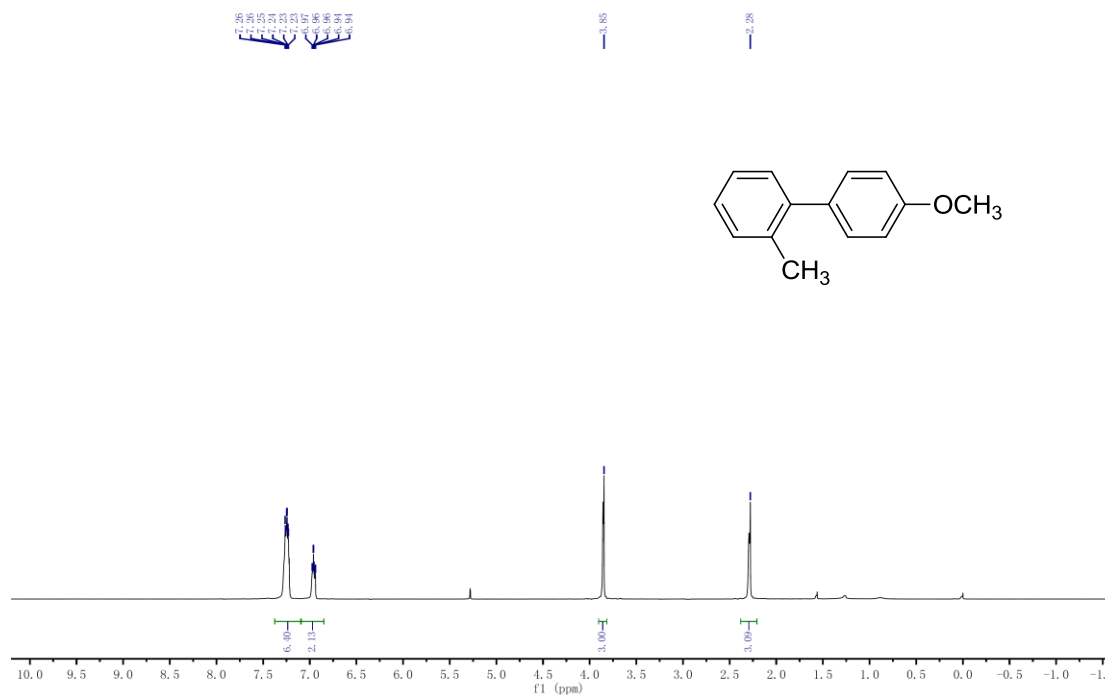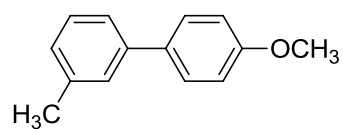

#### 4'-Methoxy-3-methyl-1,1'-biphenyl

White solid, m.p. 48-49°C. <sup>1</sup>H NMR (400 MHz, CDCl<sub>3</sub>): δ 7.52 (d, *J* = 8.4 Hz, 2H), 7.37-7.31 (m, 3H), 7.12 (d, *J* = 7.2 Hz, 1H), 6.97 (d, *J* = 8.4 Hz, 2H), 3.86 (s, 3H), 2.41 (s, 3H) ppm. Data is consistent with that reported in the literature.<sup>2</sup>

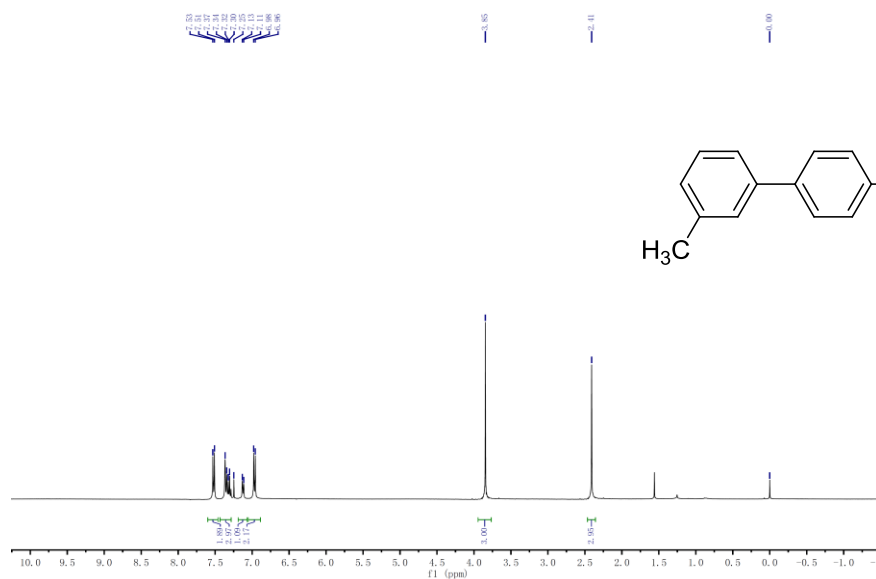

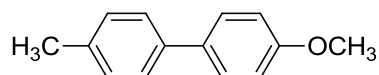

#### 4-Methoxy-4-methyl biphenyl

White solid, m.p. 102-104°C.  $^1\text{H NMR}$  (400 MHz,  $\text{CDCl}_3$ ):  $\delta$  7.51 (d,  $J = 8.0$  Hz, 2H), 7.45 (d,  $J = 8.0$  Hz, 2H), 7.23 (d,  $J = 8.0$  Hz, 2H), 6.97 (d,  $J = 8.0$  Hz, 2H), 3.85 (s, 3H), 2.38 (s, 3H) ppm. Data is consistent with that reported in the literature.<sup>1</sup>

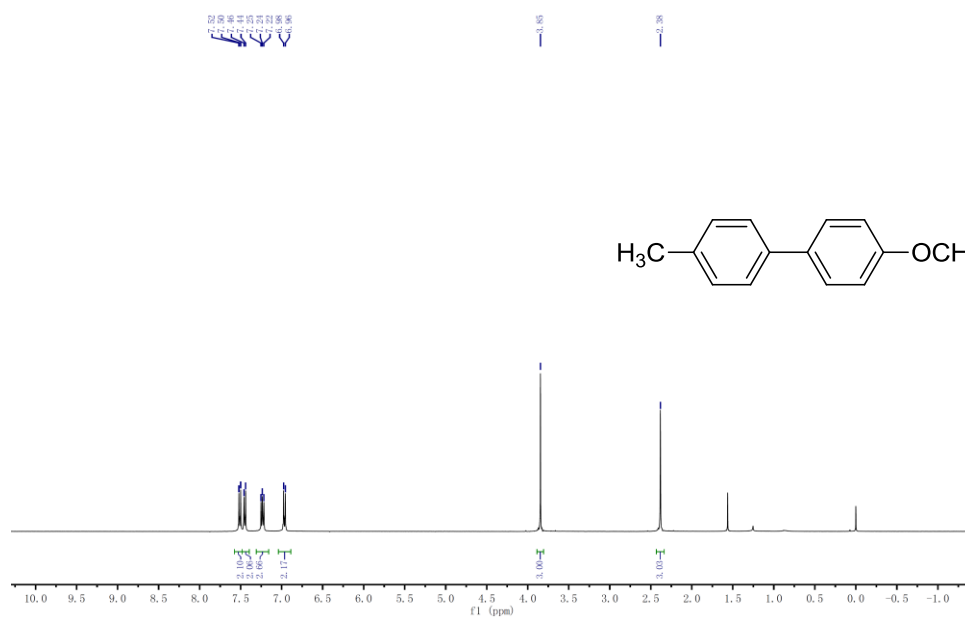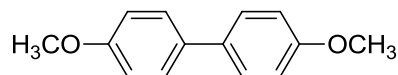

#### 4, 4'-Dimethoxy-1, 1'-biphenyl

White solid, m.p. 170-172°C.  $^1\text{H NMR}$  (400 MHz,  $\text{CDCl}_3$ ):  $\delta$  7.48 (d,  $J = 7.6$  Hz, 4H), 6.96 (d,  $J = 8.0$  Hz, 4H), 3.84 (s, 3H) ppm. Data is consistent with that reported in the literature.<sup>2</sup>

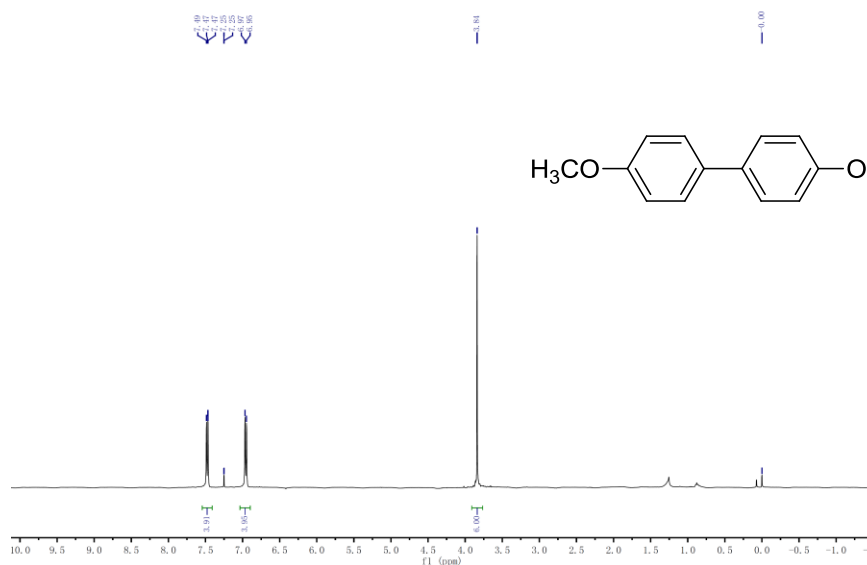

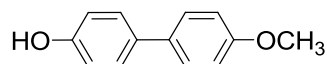

4'-methoxy-[1, 1'-biphenyl]-4-ol

White solid, m.p. 172-174°C. <sup>1</sup>H NMR (400 MHz, CDCl<sub>3</sub>): δ 7.47 (d, *J* = 8.0 Hz, 2H), 7.43 (d, *J* = 8.0 Hz, 2H), 6.96 (d, *J* = 8.0 Hz, 2H), 6.89 (d, *J* = 8.0 Hz, 2H), 3.86 (s, 3H) ppm. Data is consistent with that reported in the literature.<sup>3</sup>

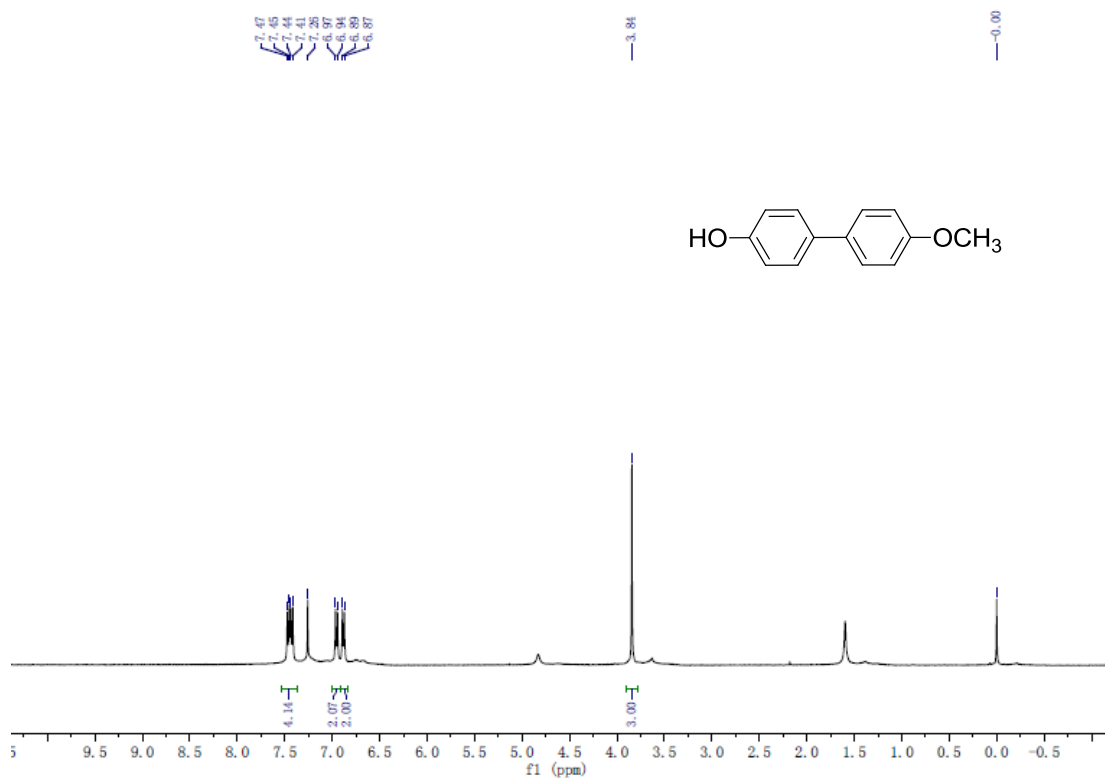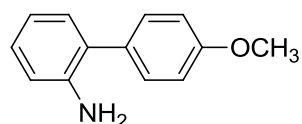

4-Methoxy-2'-aminobiphenyl

Yellow oil. <sup>1</sup>H NMR (400 MHz, CDCl<sub>3</sub>): δ 7.38 (d, *J* = 8.0 Hz, 2H), 7.15-7.10 (m, 2H), 6.98 (d, *J* = 8.0 Hz, 2H), 6.83-6.75 (m, 2H), 3.85 (s, 3H), 3.74 (s, 2H) ppm. Data is consistent with that reported in the literature.<sup>4</sup>

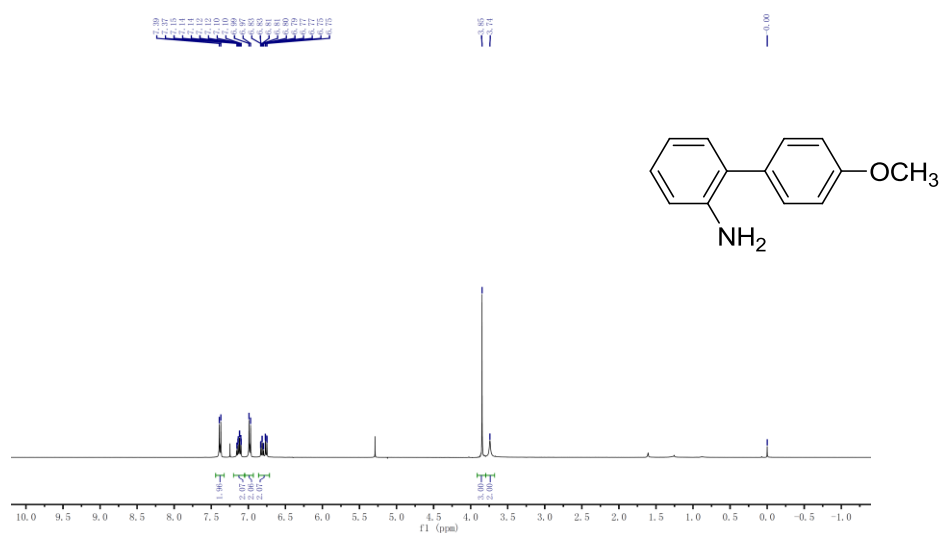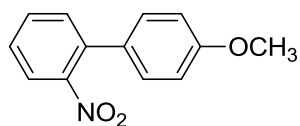

#### 4'-Methoxy-2-nitrobiphenyl

Yellow solid, m.p. 55-57°C. <sup>1</sup>H NMR (400 MHz, CDCl<sub>3</sub>): δ 7.80 (d, *J* = 8.0 Hz, 1H), 7.59 (t, *J* = 8.0 Hz, 1H), 7.43 (d, *J* = 8.0 Hz, 2H), 7.27-7.25 (m, 2H), 6.96 (d, *J* = 8.0 Hz, 2H), 3.85 (s, 3H) ppm. Data is consistent with that reported in the literature.<sup>5</sup>

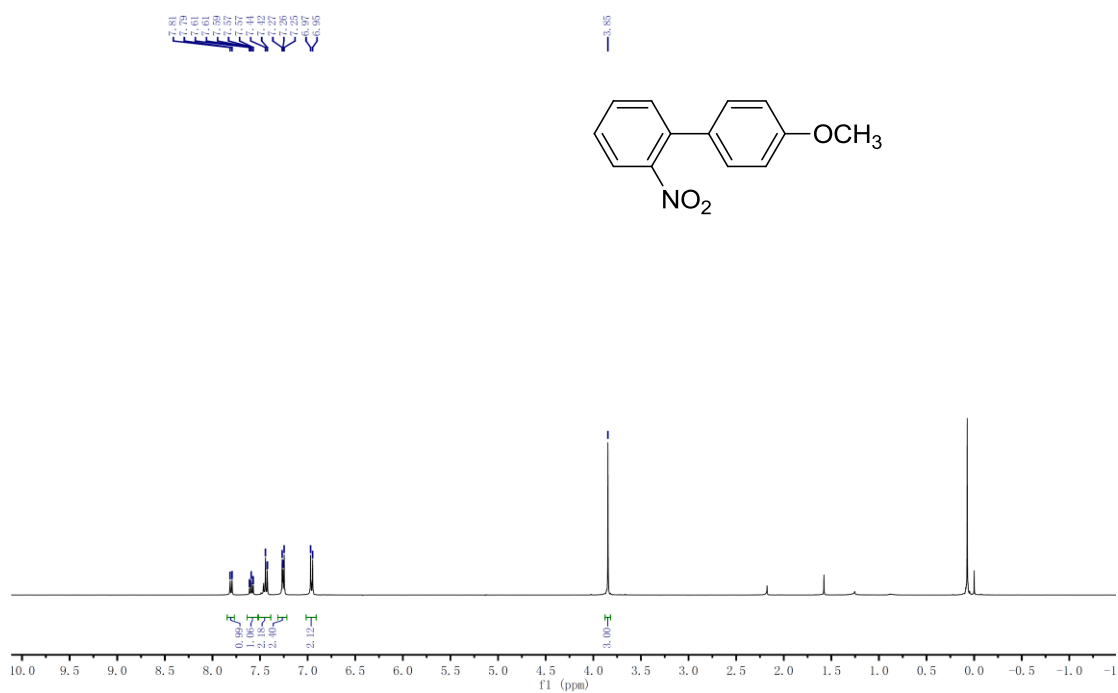

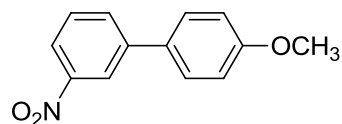

#### 4-Methoxy-3'-nitrobiphenyl

Yellow solid, m.p. 67-69°C. <sup>1</sup>H NMR (400 MHz, CDCl<sub>3</sub>): δ 8.41 (s, 1H), 8.15 (d, *J* = 8.0 Hz, 1H), 7.87 (d, *J* = 7.6 Hz, 1H), 7.60-7.56 (m, 3H), 7.02 (d, *J* = 8.0 Hz, 2H), 3.88 (s, 3H) ppm. Data is consistent with that reported in the literature.<sup>6</sup>

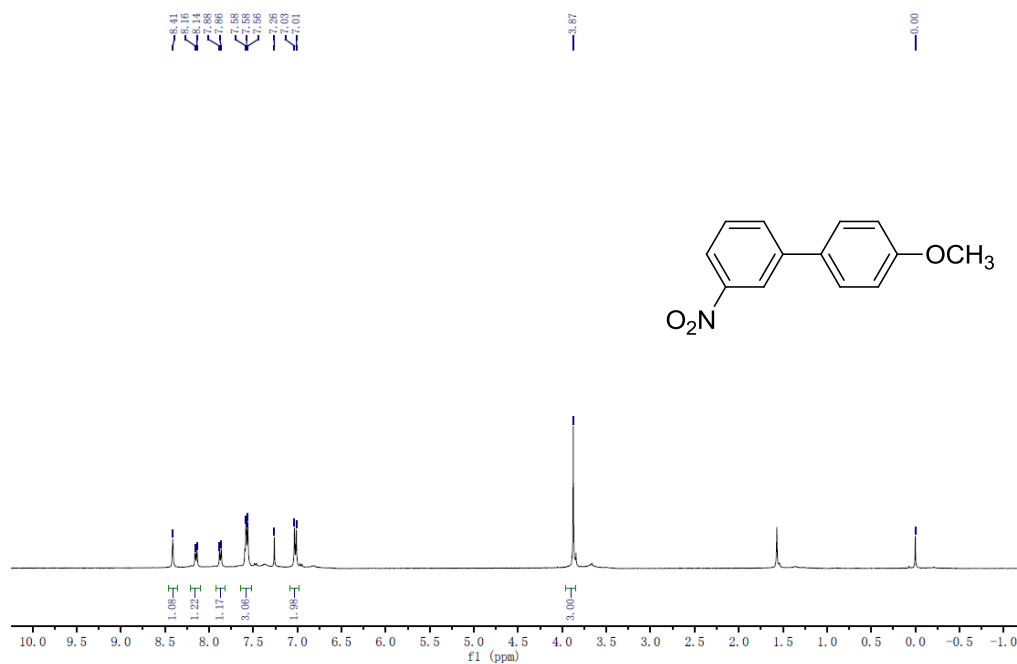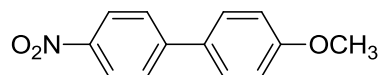

#### 4-Methoxy-4'-nitro-1, 1'-biphenyl

Yellow solid, m.p. 97-99°C. <sup>1</sup>H NMR (400 MHz, CDCl<sub>3</sub>): δ 8.27 (d, *J* = 8.8 Hz, 2H), 7.69 (d, *J* = 8.8 Hz, 2H), 7.59 (d, *J* = 8.8 Hz, 2H), 7.02 (d, *J* = 8.8 Hz, 2H), 3.88 (s, 3H) ppm. Data is consistent with that reported in the literature.<sup>3</sup>

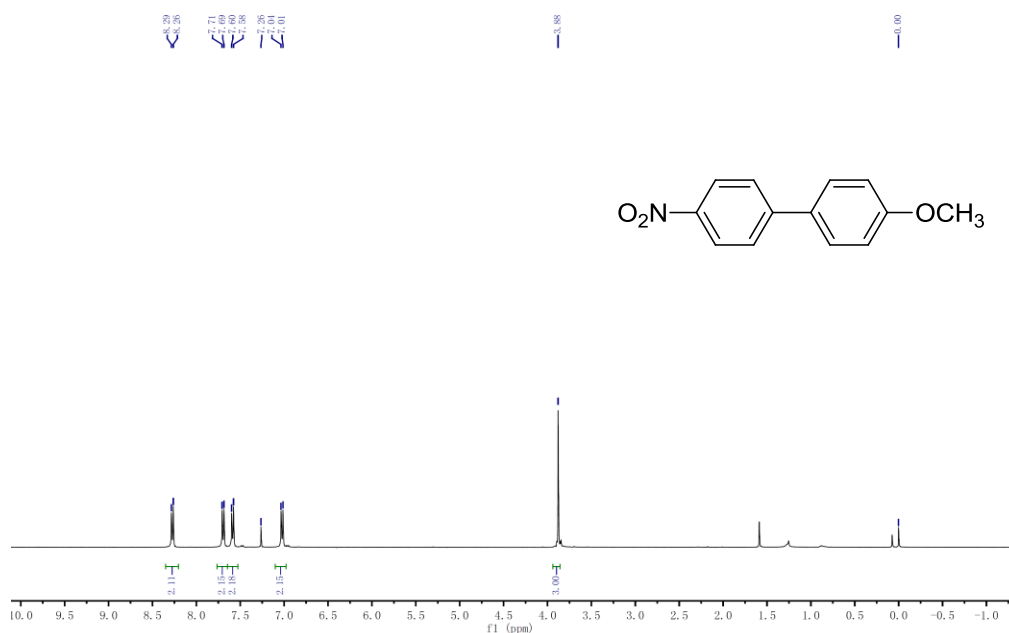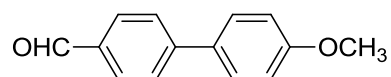

#### 4'-Methoxy-[1, 1'-biphenyl]-4-carboxaldehyde

White solid, m.p. 100-101°C. <sup>1</sup>H NMR (400 MHz, CDCl<sub>3</sub>): δ 10.04 (s, 1H), 7.93 (d, *J* = 8.0 Hz, 2H), 7.72 (d, *J* = 8.0 Hz, 2H), 7.60 (d, *J* = 8.0 Hz, 2H), 7.02 (d, *J* = 8.0 Hz, 2H), 3.87 (s, 3H) ppm. Data is consistent with that reported in the literature.<sup>3</sup>

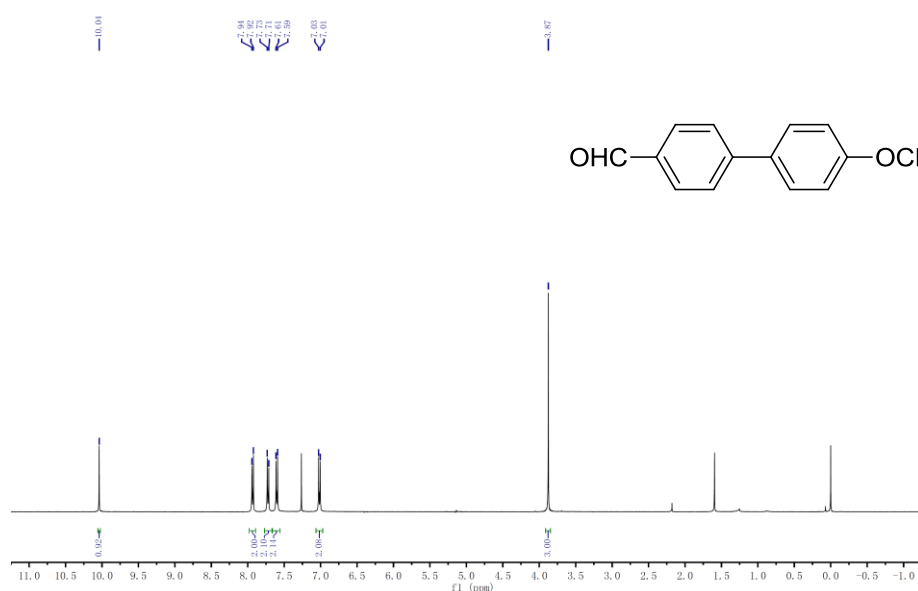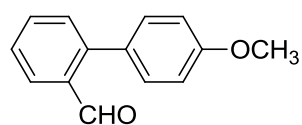

#### 4'-Methoxybiphenyl-2-carbaldehyde

White solid, m.p. 47-49°C.  $^1\text{H NMR}$  (400 MHz,  $\text{CDCl}_3$ ):  $\delta$  10.00 (s, 1H), 8.01 (d,  $J = 8.0$  Hz, 1H), 7.63 (t,  $J = 1.2$  Hz, 1H), 7.47-7.45 (m, 2H), 7.32 (d,  $J = 12.0$  Hz, 2H), 7.01 (d,  $J = 8.0$  Hz, 2H), 3.88 (s, 3H) ppm. Data is consistent with that reported in the literature.<sup>7</sup>

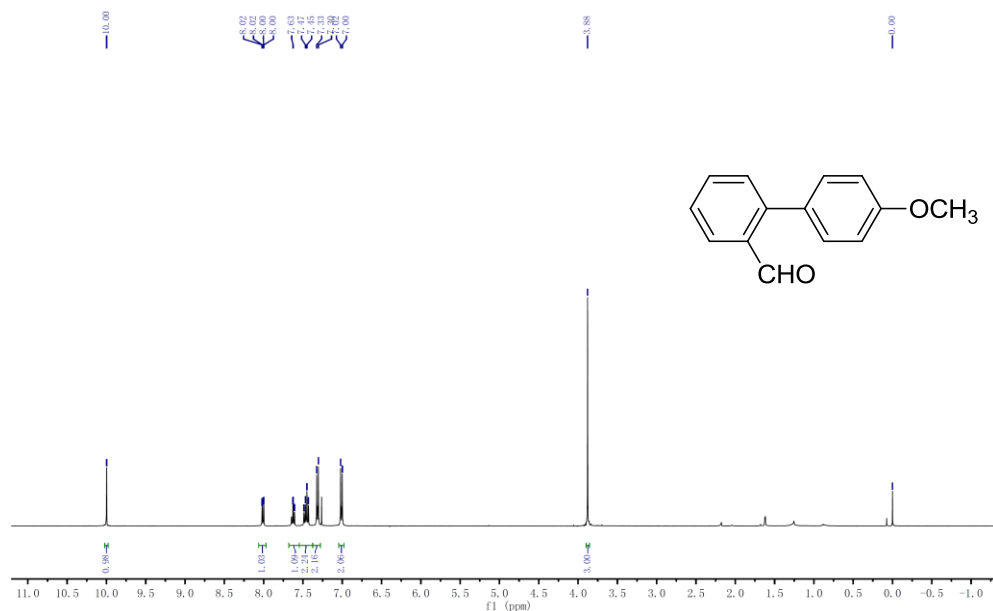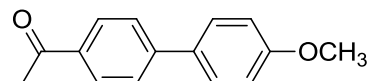

1-(4'-Methoxy-[1,1'-biphenyl]-4-yl) ethanone

White solid, m.p. 149-151°C.  $^1\text{H NMR}$  (400 MHz,  $\text{CDCl}_3$ ):  $\delta$  8.01 (d,  $J = 7.2$  Hz, 2H), 7.65 (d,  $J = 7.2$  Hz, 2H), 7.59 (d,  $J = 7.2$  Hz, 2H), 7.01 (d,  $J = 7.6$  Hz, 2H), 3.87 (s, 3H), 2.64 (s, 3H) ppm. Data is consistent with that reported in the literature.<sup>2</sup>



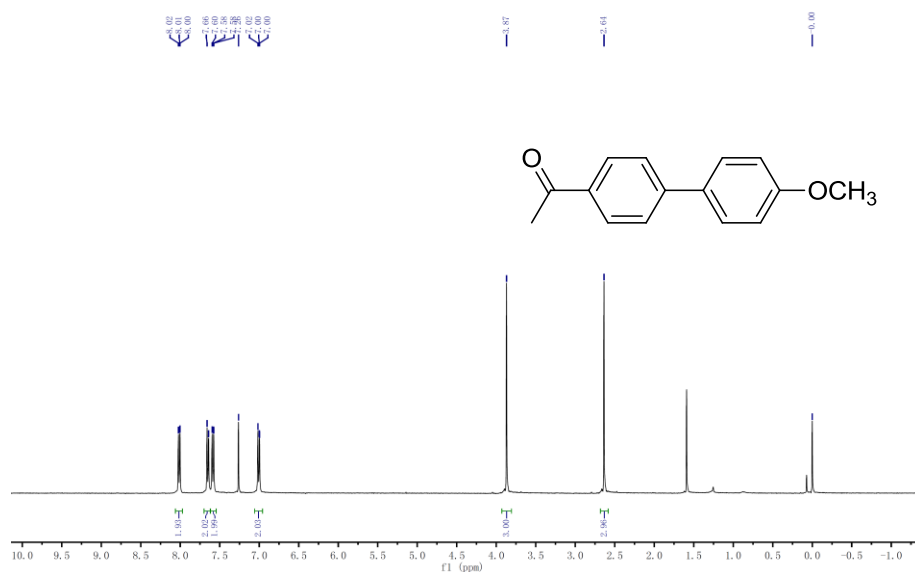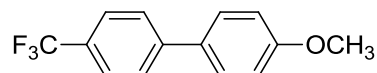

#### 4-Methoxy-4'-trifluoromethylphenyl

White solid, m.p. 116-117°C. <sup>1</sup>H NMR (400 MHz, CDCl<sub>3</sub>): δ 7.68-7.63 (m, 4H), 7.54 (d, *J* = 8.4 Hz, 2H), 7.00 (d, *J* = 8.8 Hz, 2H), 3.86 (s, 3H) ppm. Data is consistent with that reported in the literature.<sup>8</sup>

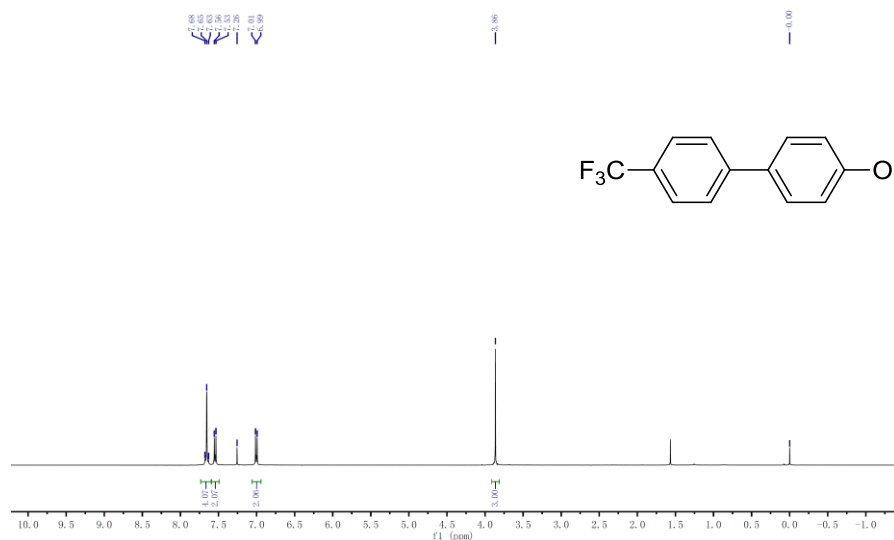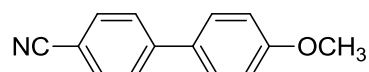

#### 4'-Methoxy-1,1'-biphenyl-4-carbonitrile

White solid, m.p. 93-95°C. <sup>1</sup>H NMR (400 MHz, CDCl<sub>3</sub>): δ 7.70 (d, *J* = 8.0 Hz, 2H), 7.64 (d, *J* = 8.0 Hz, 2H), 7.55 (d, *J* = 8.8 Hz, 2H), 7.01 (d, *J* = 8.4 Hz, 2H), 3.87 (s, 3H) ppm. Data is consistent with that reported in the literature.<sup>3</sup>

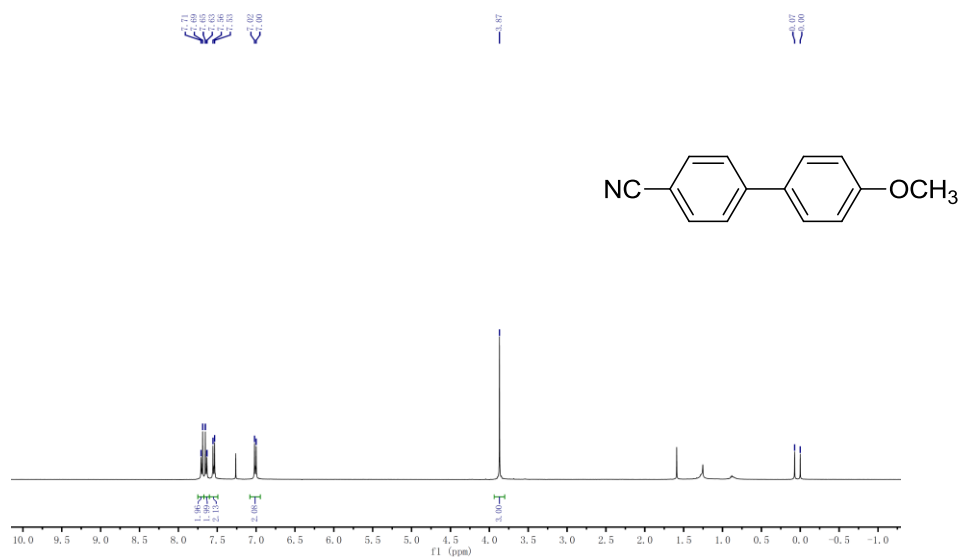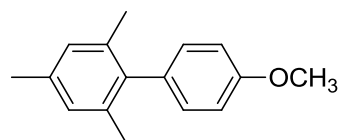

#### 4'-methoxy-2,4,6-trimethyl-1,1'-biphenyl

White solid, m.p. 69-71°C. <sup>1</sup>H NMR (400 MHz, CDCl<sub>3</sub>): δ 7.05 (d, *J* = 8.0 Hz, 2H), 6.95 (d, *J* = 8.0 Hz, 4H), 3.85 (s, 3H), 2.32 (s, 3H), 2.01 (s, 6H) ppm. Data is consistent with that reported in the literature.<sup>9</sup>

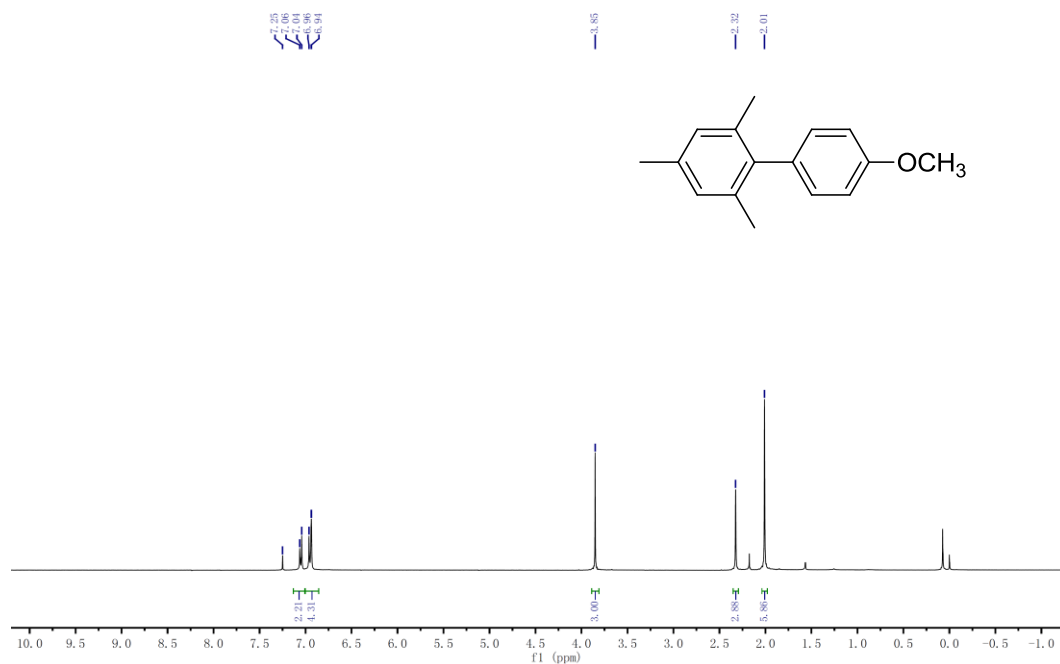

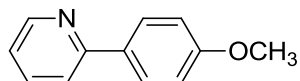

### 2-(*p*-Methoxyphenyl) pyridine

White solid, m.p. 43-45°C. <sup>1</sup>H NMR (400 MHz, CDCl<sub>3</sub>): δ 8.65 (d, *J* = 4.4 Hz, 1H), 7.95 (d, *J* = 8.8 Hz, 2H), 7.73-7.66 (m, 2H), 7.17 (t, *J* = 6.0 Hz, 1H), 7.00 (d, *J* = 8.4 Hz, 2H), 3.86 (s, 3H) ppm. Data is consistent with that reported in the literature.<sup>10</sup>

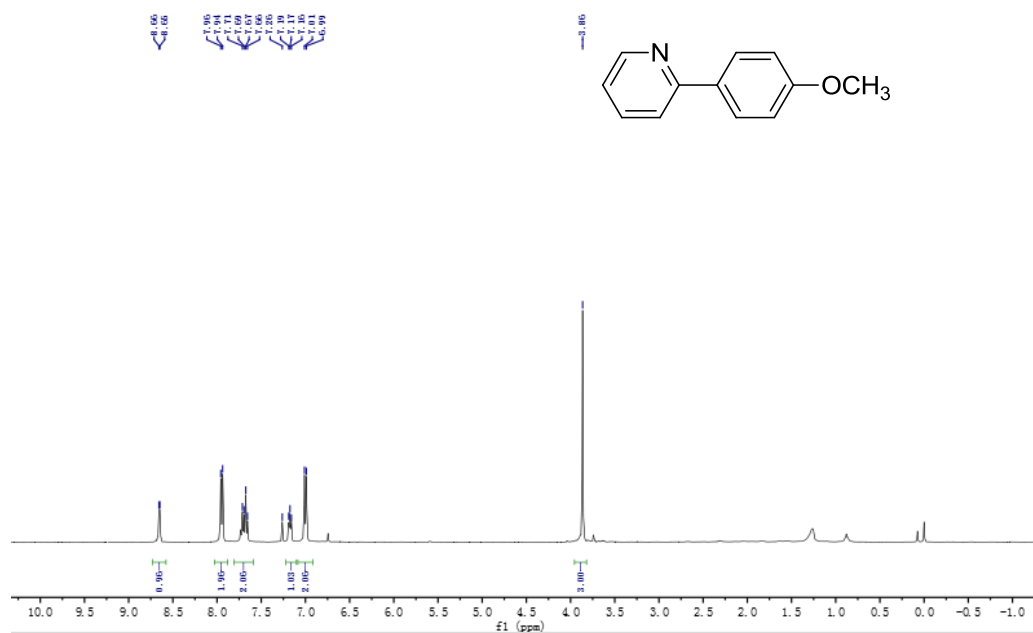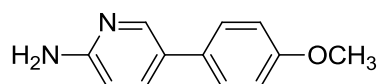

### 5-(4-methoxyphenyl)-pyridin-2-yl amine

White solid, m.p. 169-171°C. <sup>1</sup>H NMR (400 MHz, CDCl<sub>3</sub>): δ 8.28 (d, *J* = 4.0 Hz, 1H), 7.63 (d, *J* = 8.0 Hz, 1H), 7.43 (d, *J* = 8.4 Hz, 2H), 6.97 (d, *J* = 8.4 Hz, 2H), 6.57 (d, *J* = 8.4 Hz, 1H), 4.47 (br, 2H), 3.84 (s, 3H) ppm. Data is consistent with that reported in the literature.<sup>11</sup>

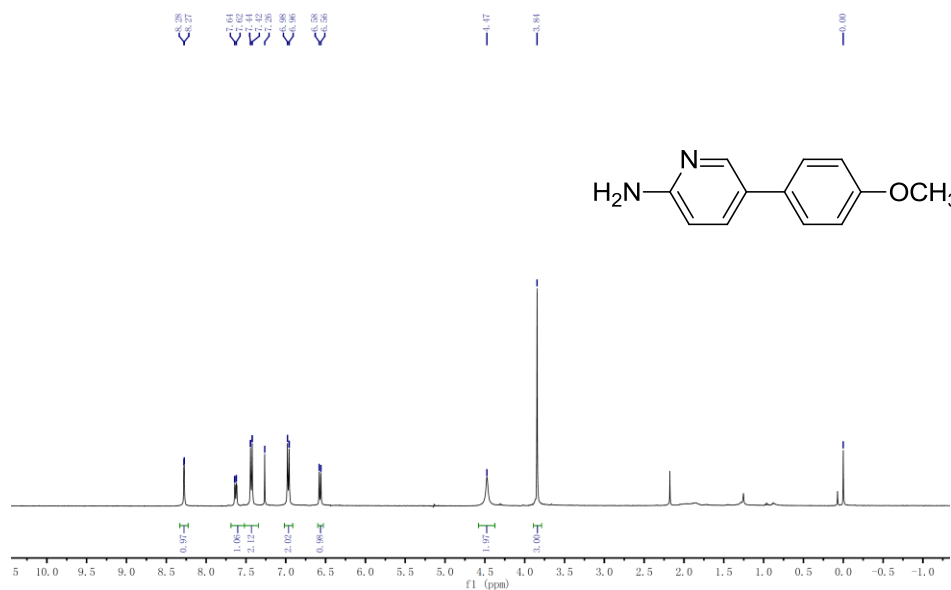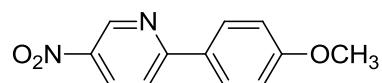

### 2-(4-methoxyphenyl)-5-nitropyridine

Yellow solid, m.p. 126-128°C. <sup>1</sup>H NMR (400 MHz, CDCl<sub>3</sub>): δ 9.45 (d, *J* = 4.0 Hz, 1H), 8.50-8.47 (m, 1H), 8.08 (d, *J* = 8.0 Hz, 2H), 7.84 (d, *J* = 8.0 Hz, 1H), 7.04 (d, *J* = 8.0 Hz, 2H), 3.90 (s, 3H) ppm. Data is consistent with that reported in the literature.<sup>12</sup>

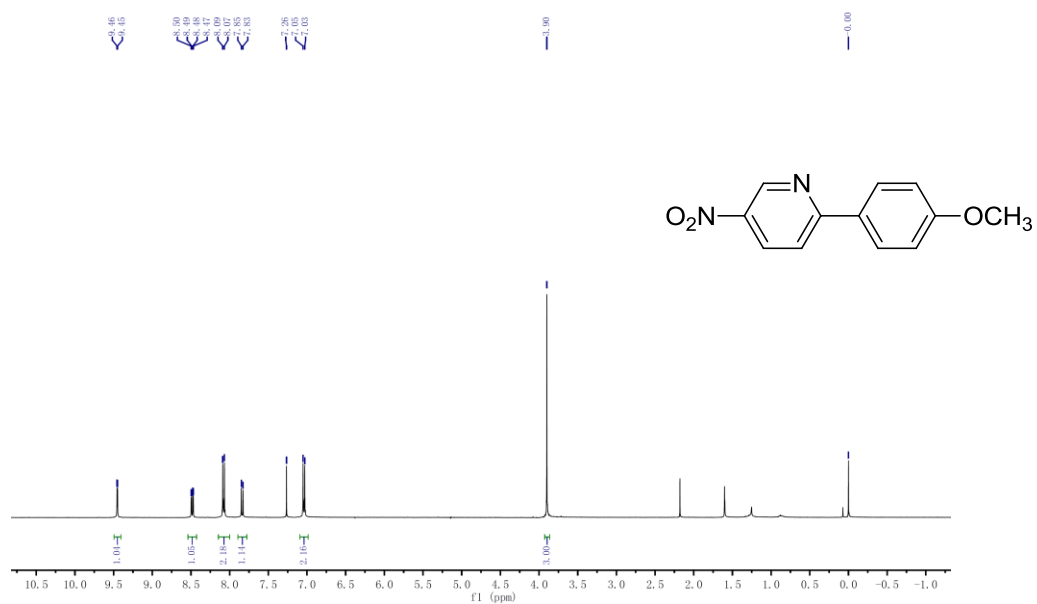

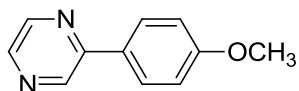

### 2-(4-Methoxyphenyl)pyrazine

White solid, m.p. 83-85°C.  $^1\text{H}$  NMR (400 MHz,  $\text{CDCl}_3$ ):  $\delta$  8.99 (s, 1H), 8.59 (s, 1H), 8.45 (s, 1H), 7.99 (d,  $J = 8.8$  Hz, 2H), 7.04 (d,  $J = 8.8$  Hz, 2H), 3.89 (s, 3H) ppm. Data is consistent with that reported in the literature.<sup>10</sup>

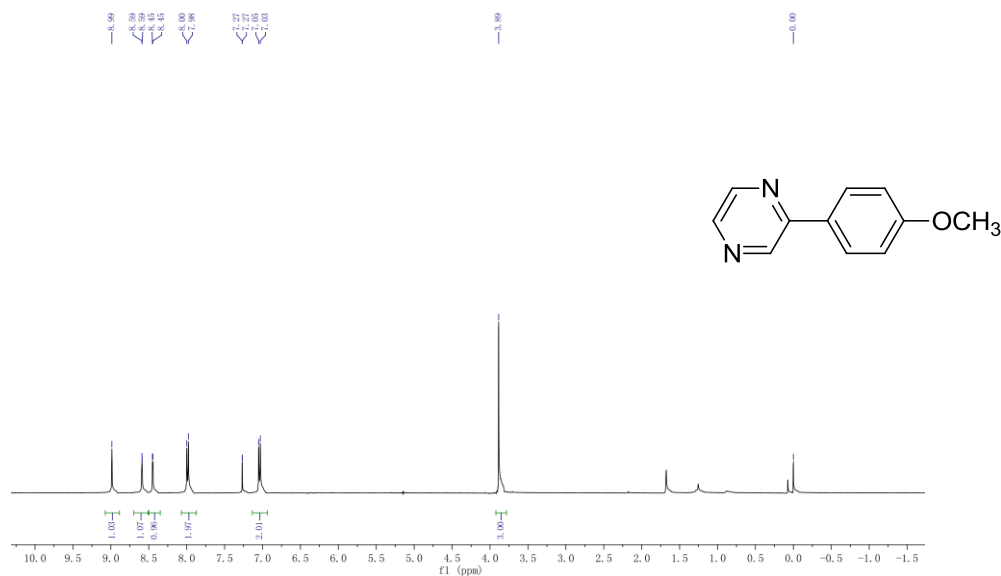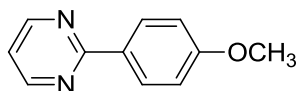

### 2-(4-methoxyphenyl)pyrimidine

Yellow solid, m.p. 51-53°C.  $^1\text{H}$  NMR (400 MHz,  $\text{CDCl}_3$ ):  $\delta$  8.77 (d,  $J = 5.2$  Hz, 2H), 8.40 (d,  $J = 8.8$  Hz, 2H), 7.13 (t,  $J = 6.0$  Hz, 1H), 7.01 (d,  $J = 8.4$  Hz, 2H), 3.88 (s, 3H) ppm. Data is consistent with that reported in the literature.<sup>13</sup>

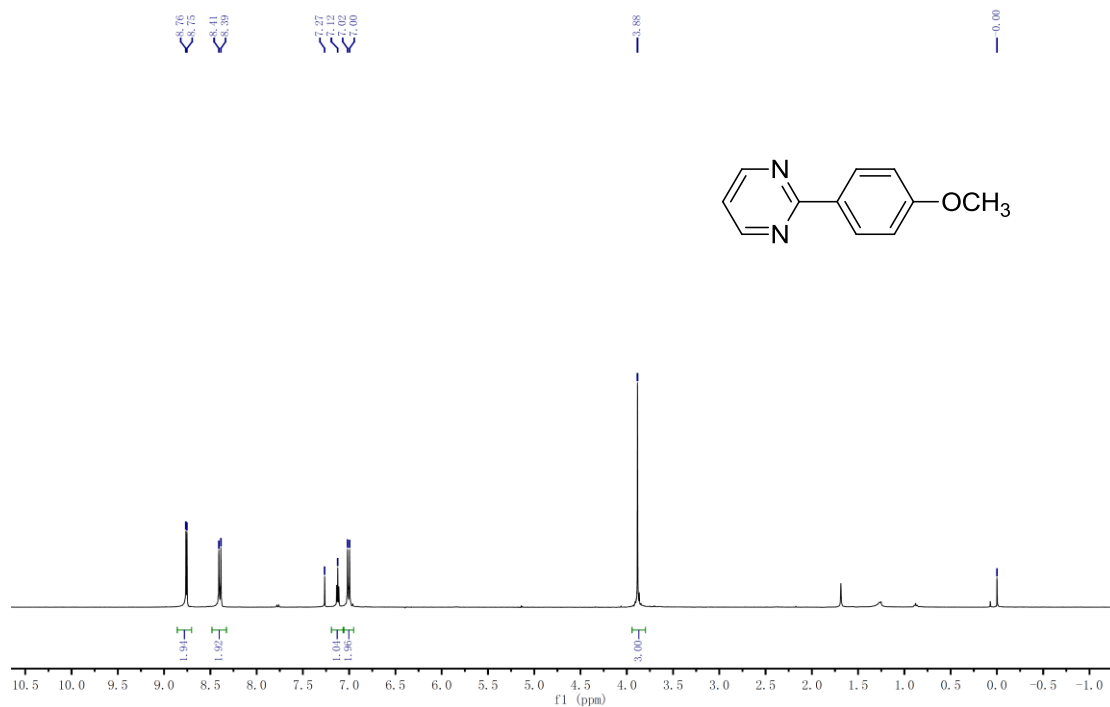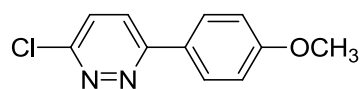

### 3-chloro-6-(4-methoxyphenyl) pyridazine

Light grey solid, m.p. 150-152°C. <sup>1</sup>H NMR (400 MHz, CDCl<sub>3</sub>): δ 8.02 (d, *J* = 8.8 Hz, 2H), 7.78 (d, *J* = 8.8 Hz, 1H), 7.52 (d, *J* = 8.8 Hz, 1H), 7.04 (d, *J* = 8.8 Hz, 2H), 3.89 (s, 3H) ppm. Data is consistent with that reported in the literature.<sup>14</sup>

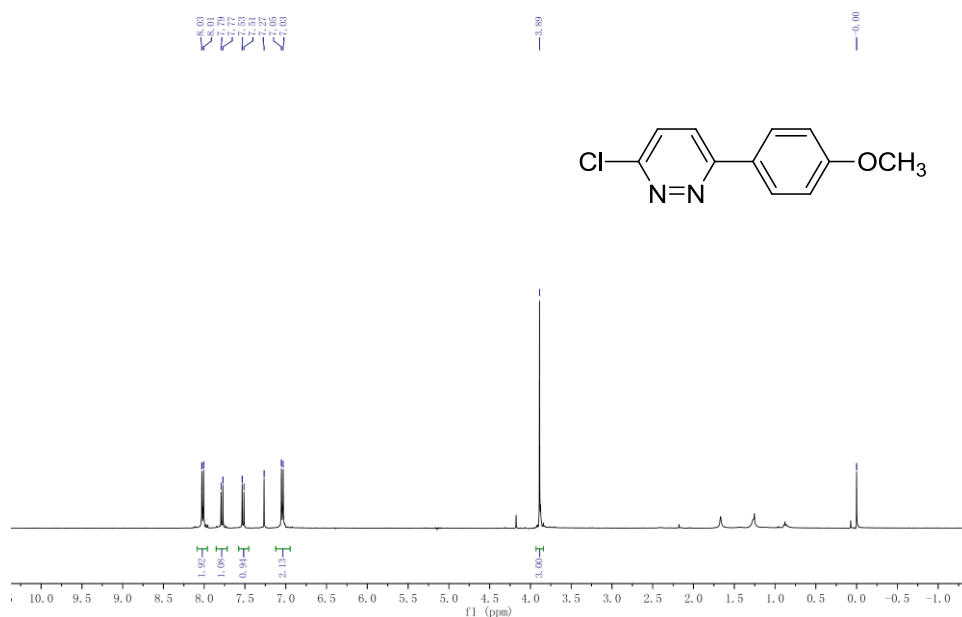

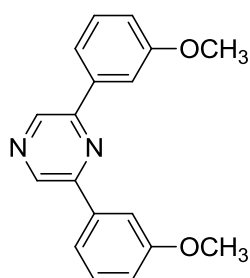

2, 6-bis(3-methoxyphenyl) pyrazine

White solid, m.p. 128-130°C.  $^1\text{H NMR}$  (400 MHz,  $\text{CDCl}_3$ ):  $\delta$  8.85 (s, 2H), 8.11 (d,  $J = 8.0$  Hz, 4H), 7.05 (d,  $J = 8.0$  Hz, 4H), 3.89 (s, 6H) ppm. Data is consistent with that reported in the literature.<sup>15</sup>

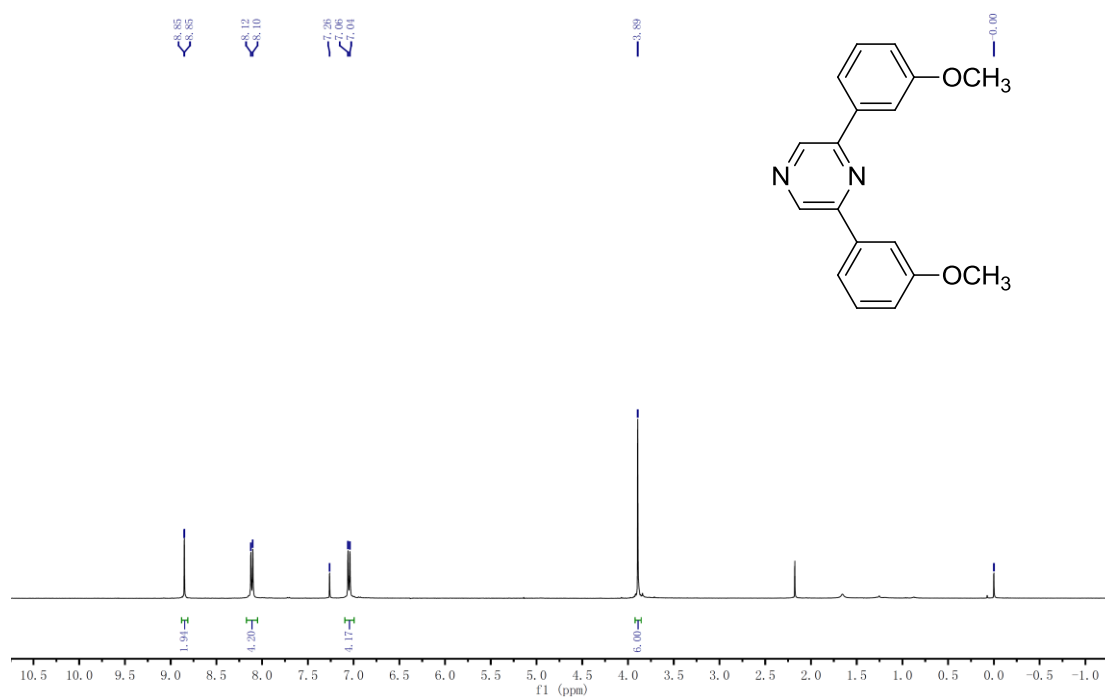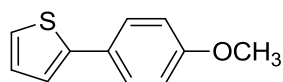

2-(4-methoxyphenyl) thiophene

White solid, m.p. 104-105°C.  $^1\text{H NMR}$  (400 MHz,  $\text{CDCl}_3$ ):  $\delta$  7.54 (d,  $J = 8.0$  Hz, 2H), 7.20 (t,  $J = 6.0$  Hz, 2H), 7.25-7.04 (m, 3H), 6.91 (d,  $J = 8.0$  Hz, 2H), 3.83 (s, 3 H) ppm. Data is consistent with that reported in the literature.<sup>16</sup>

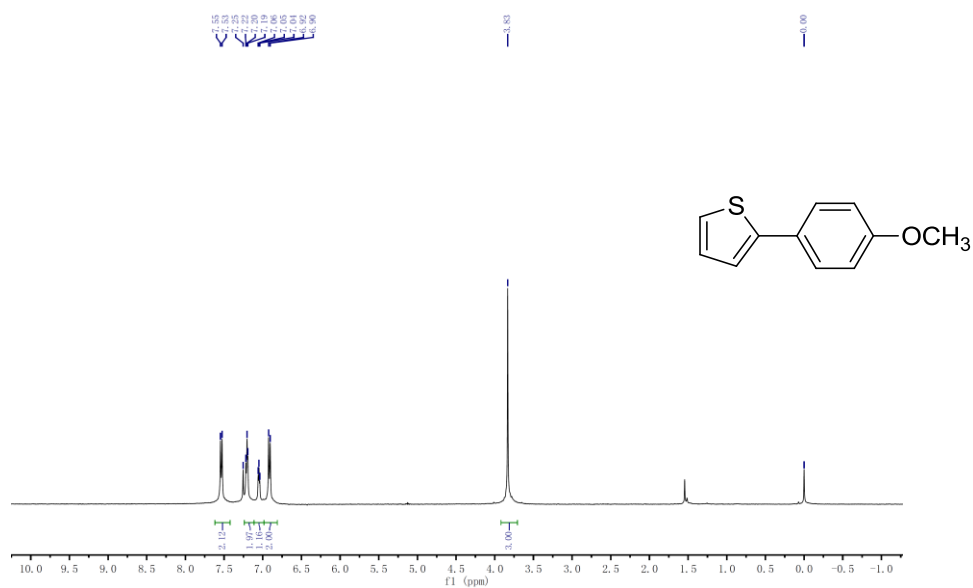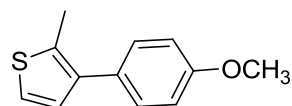

### 3-(4-methoxyphenyl)-2-methylthiophene

Colorless oil. <sup>1</sup>H NMR (400 MHz, CDCl<sub>3</sub>): δ 7.32 (d, *J* = 8.0 Hz, 2H), 7.08 (d, *J* = 4.0 Hz, 1H), 7.00 (d, *J* = 4.0 Hz, 1H), 6.95 (d, *J* = 8.0 Hz, 2H), 3.84 (s, 3H), 2.94 (s, 3H) ppm. <sup>13</sup>C NMR (100.6 MHz, CDCl<sub>3</sub>): δ 158.34, 138.19, 133.24, 129.66, 129.22, 129.16, 121.25, 113.74, 55.20, 14.07 ppm. HRMS (EI) for C<sub>12</sub>H<sub>12</sub>OS: calcd 204.0609, found 204.0612.

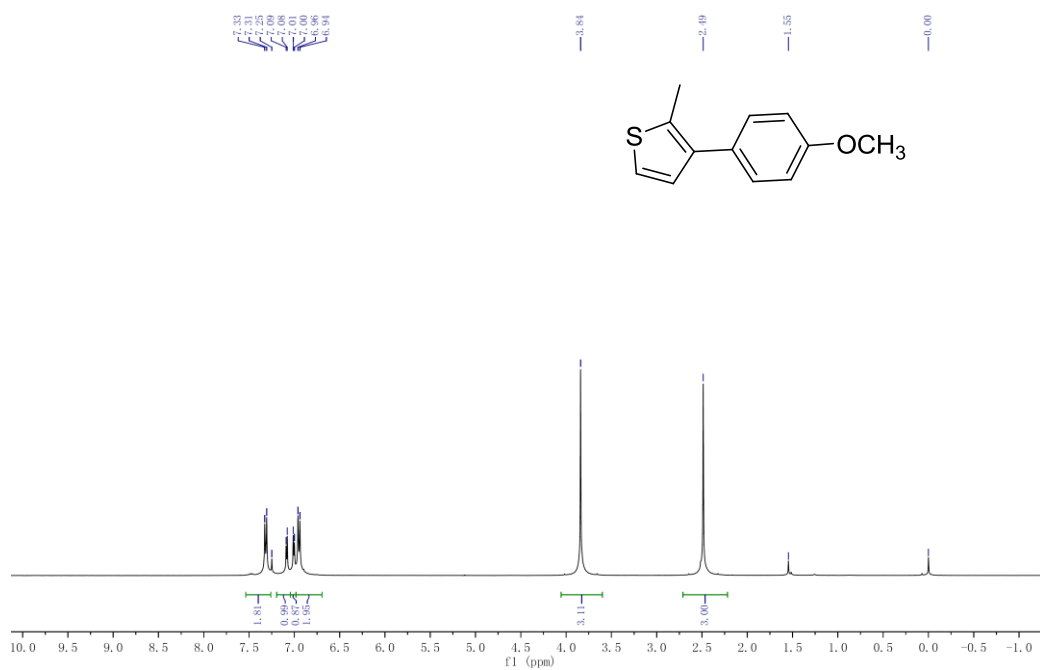



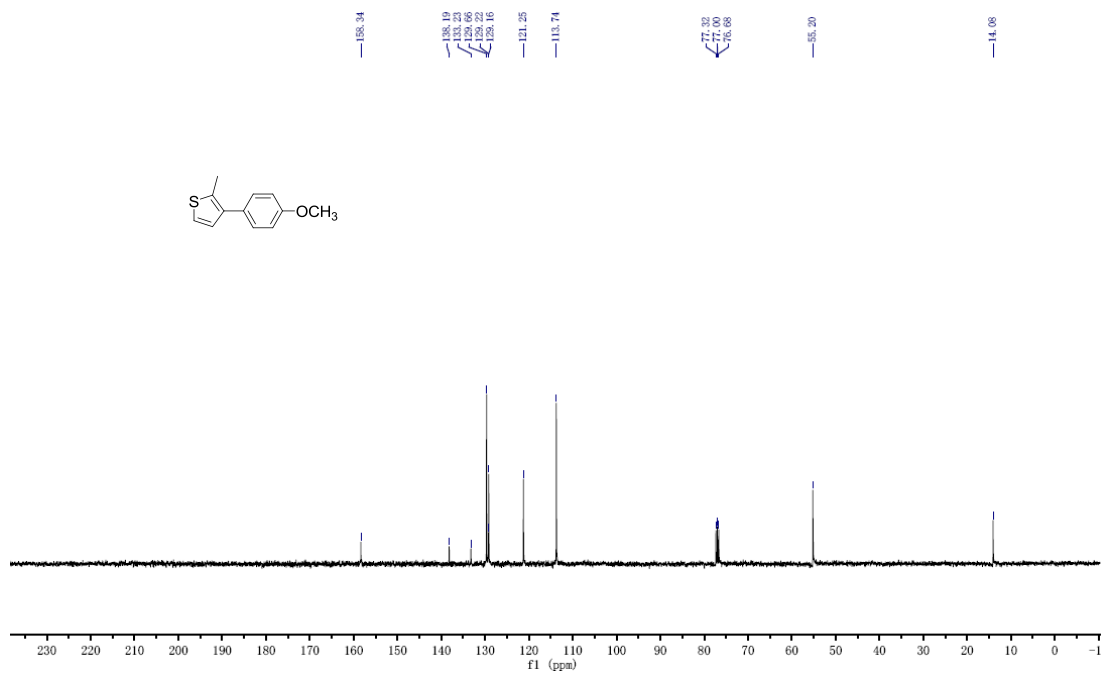

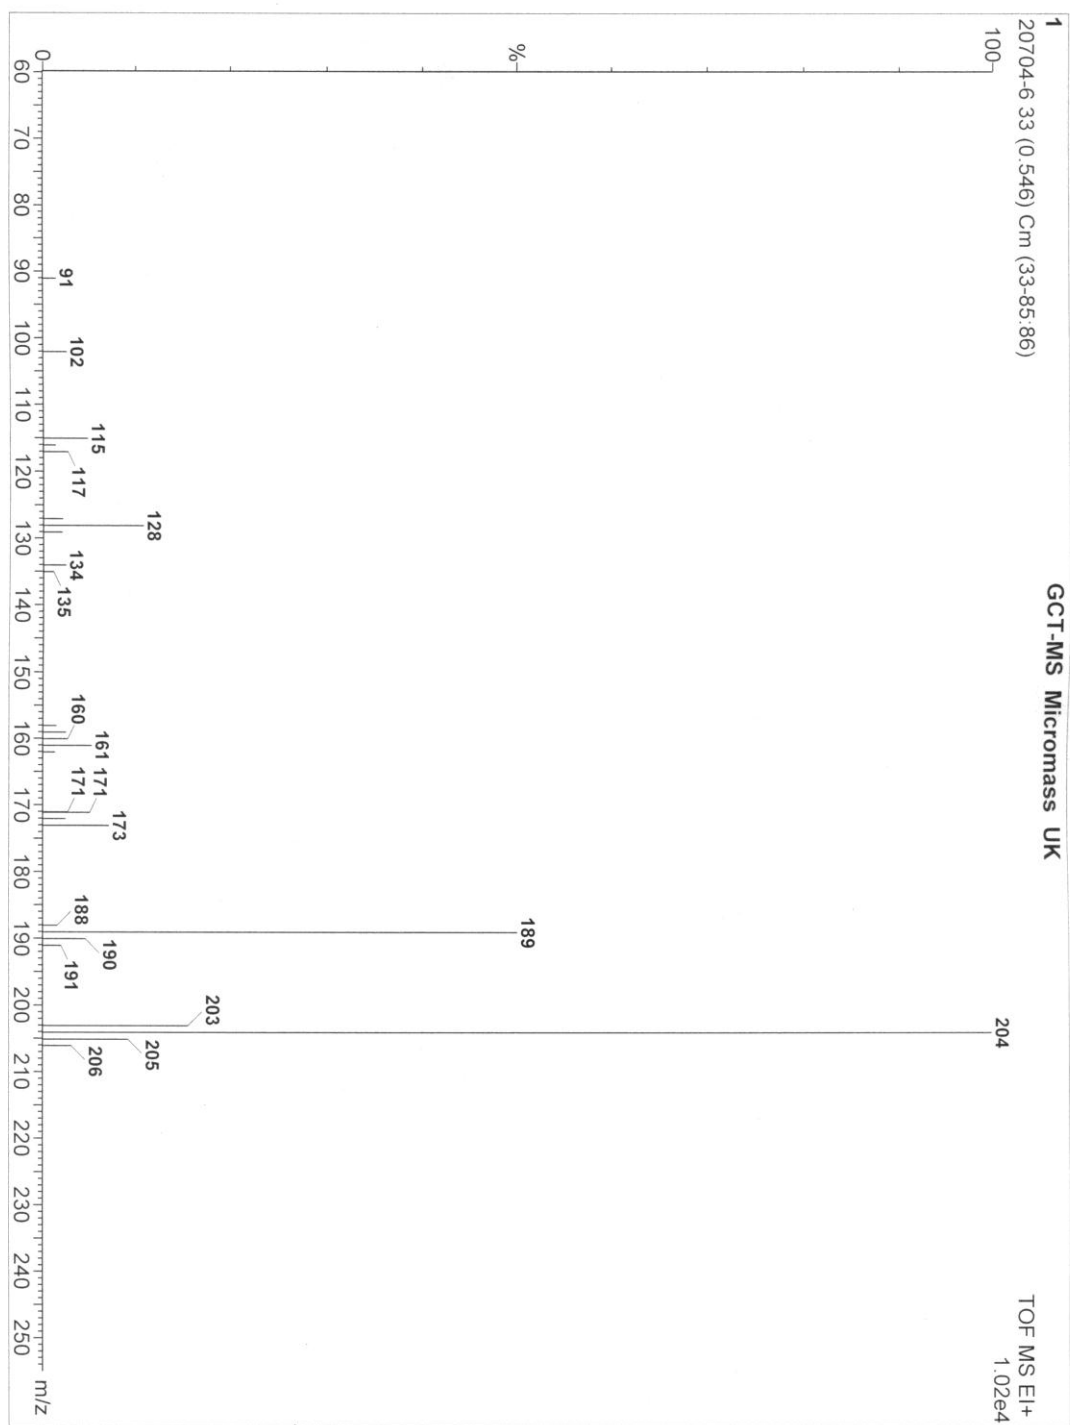

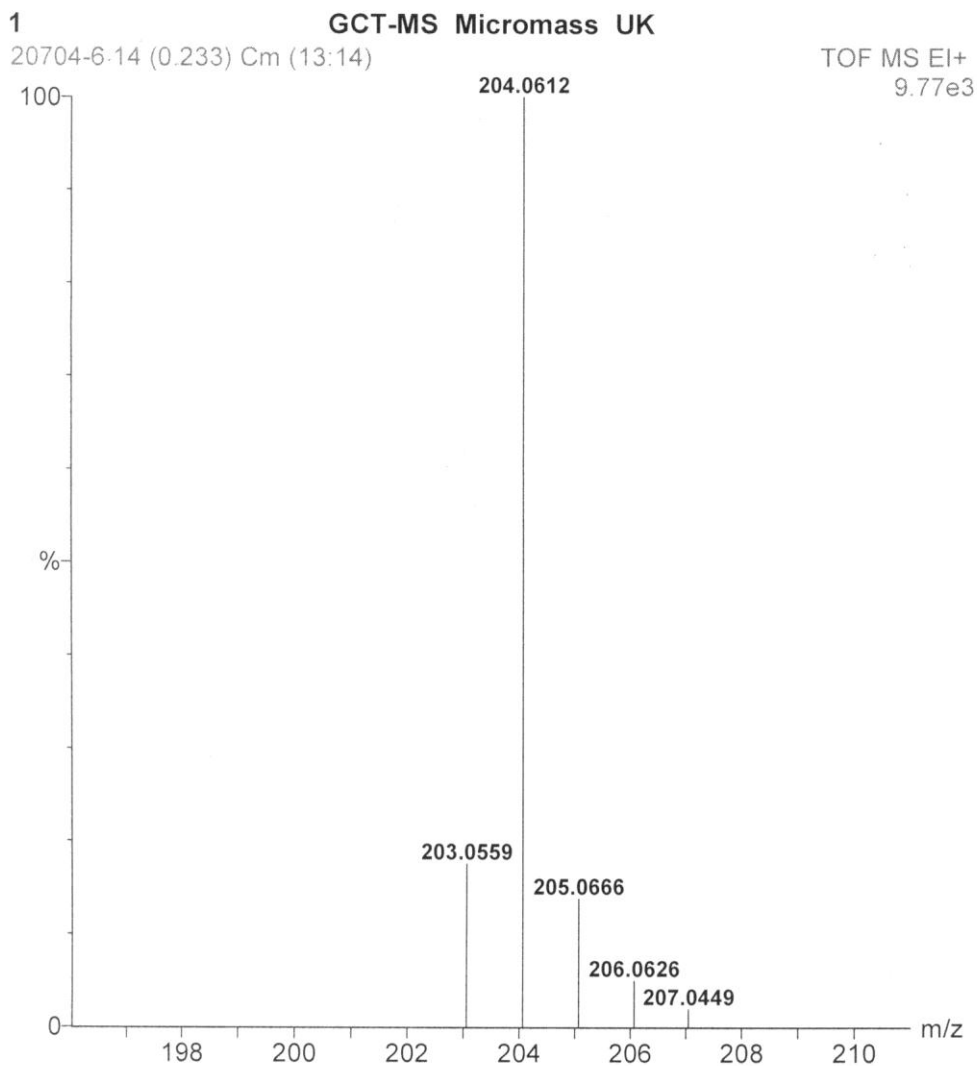

#### Elemental Composition Report

Tolerance = 10.0 PPM / DBE: min = -1.5, max = 50.0  
Isotope cluster parameters: Separation = 1.0 Abundance = 1.0%

Monoisotopic Mass, Odd and Even Electron Ions  
9 formula(e) evaluated with 1 results within limits (up to 50 closest results for each mass)

|          |        |            |       |      |      |       |             |  |
|----------|--------|------------|-------|------|------|-------|-------------|--|
| Minimum: | 80.00  |            |       |      | -1.5 |       |             |  |
| Maximum: | 100.00 |            | 200.0 | 10.0 | 50.0 |       |             |  |
| Mass     | RA     | Calc. Mass | mDa   | PPM  | DBE  | Score | Formula     |  |
| 204.0612 | 100.00 | 204.0609   | 0.3   | 1.5  | 7.0  | 1     | C12 H12 O S |  |

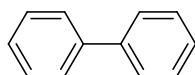

### 1,1'-biphenyl

White solid, m.p. 65-67°C. <sup>1</sup>H NMR (400 MHz, CDCl<sub>3</sub>): δ 7.59 (d, *J* = 8.0 Hz, 4H), 7.43 (t, *J* = 8.0 Hz, 4H), 7.34 (t, *J* = 8.0 Hz, 2H) ppm. Data is consistent with that reported in the literature.<sup>17</sup>

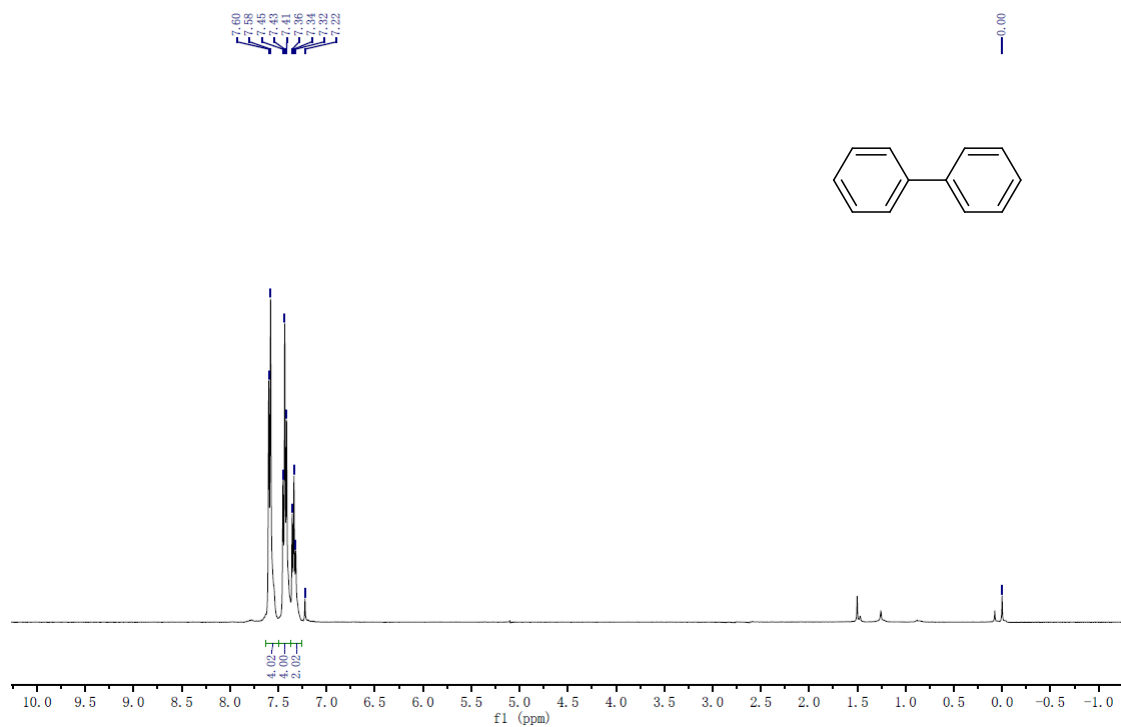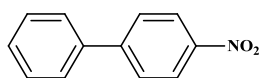

### 4-nitro-1,1'-biphenyl

Light yellow solid, m.p. 110-111°C. <sup>1</sup>H NMR (400 MHz, CDCl<sub>3</sub>): δ 8.30 (d, *J* = 8.0 Hz, 2H), 7.74 (d, *J* = 8.0 Hz, 2H), 7.63 (d, *J* = 8.0 Hz, 2H), 7.50-7.45 (m, 3H) ppm. Data is consistent with that reported in the literature.<sup>18</sup>

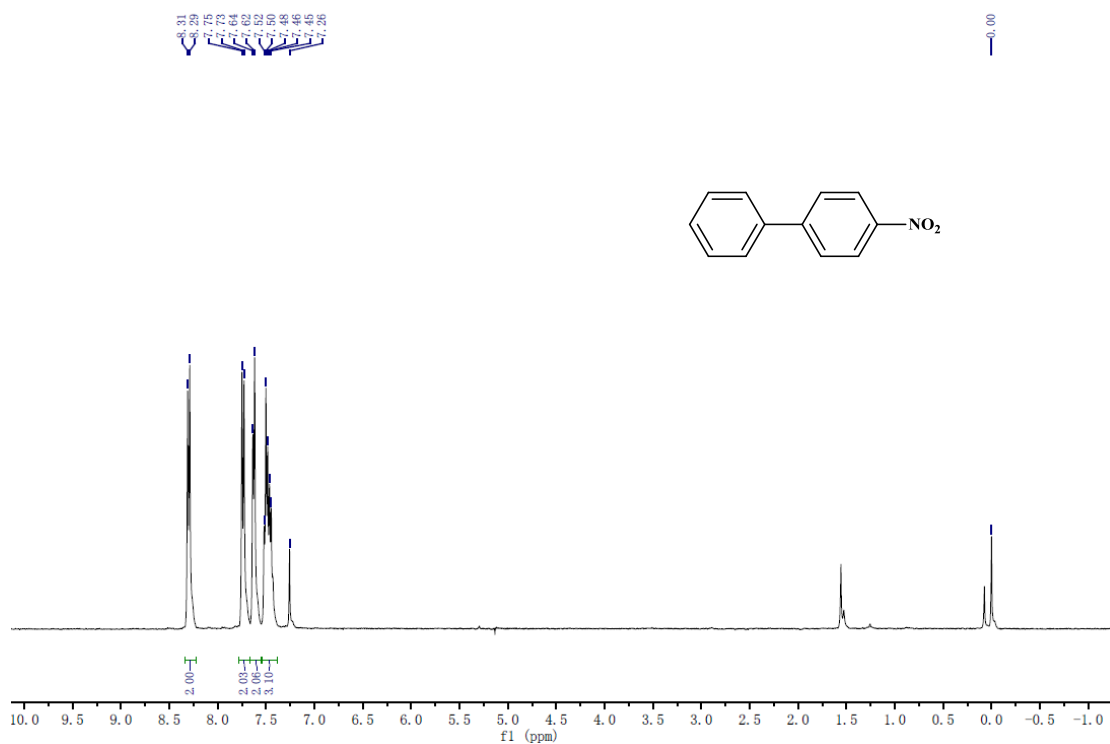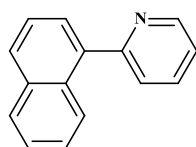

### 2-(naphthalen-1-yl)pyridine

Yellow oil. <sup>1</sup>H NMR (400 MHz, CDCl<sub>3</sub>): δ 8.79 (d, *J* = 4.0 Hz, 1H), 8.08 (d, *J* = 8.0 Hz, 1H), 7.91 (d, *J* = 8.0 Hz, 2H), 7.85-7.81 (m, 1H), 7.61-7.45 (m, 5H), 7.35-7.32 (m, 1H) ppm. Data is consistent with that reported in the literature.<sup>19</sup>

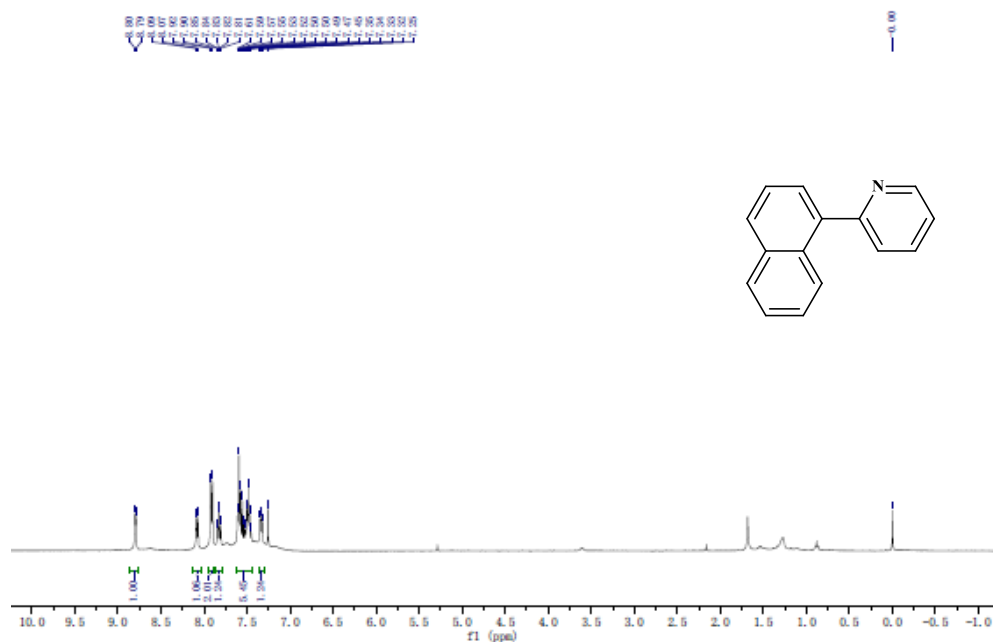

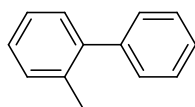

### 2-methyl-1,1'-biphenyl

colorless oil.  $^1\text{H NMR}$  (400 MHz,  $\text{CDCl}_3$ ):  $\delta$  7.43-7.24 (m, 9H), 2.27 (s, 3H) ppm. Data is consistent with that reported in the literature.<sup>19</sup>

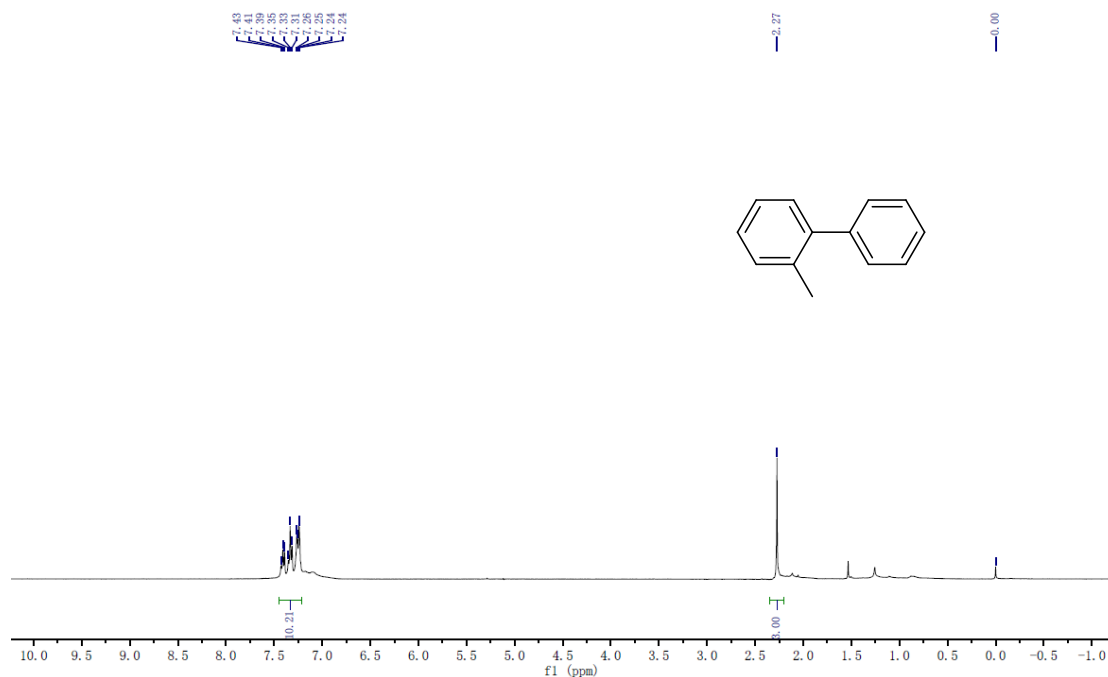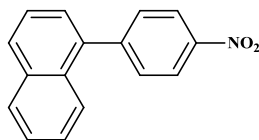

### 1-(4-nitrophenyl)naphthalene

White solid, m.p. 128-130°C.  $^1\text{H NMR}$  (400 MHz,  $\text{CDCl}_3$ ):  $\delta$  8.36 (d,  $J = 8.0$  Hz, 2 H), 8.94 (d,  $J = 8.0$  Hz, 2H), 7.78 (d,  $J = 8.0$  Hz, 1 H), 7.67 (d,  $J = 12.0$  Hz, 1H), 7.57 (d,  $J = 8.0$  Hz, 1H), 7.54-7.42(m, 4H) ppm. Data is consistent with that reported in the literature.<sup>18</sup>

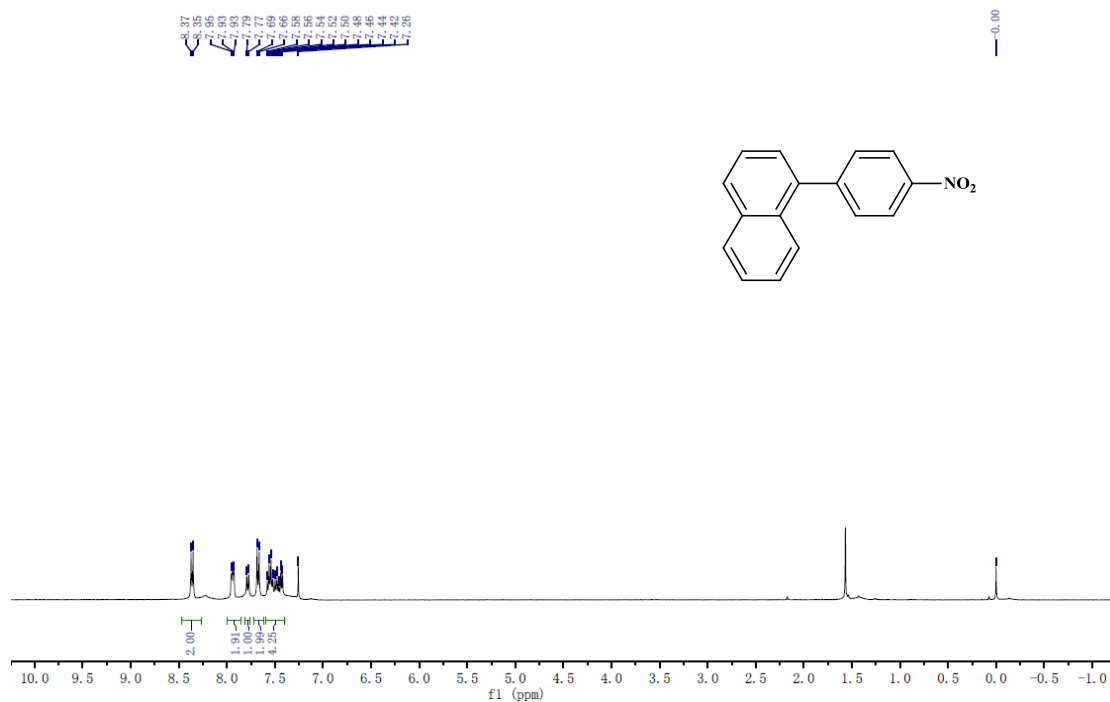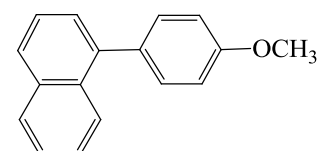

### 1-(4-methoxyphenyl)naphthalene

White solid, m.p. 115-117°C.  $^1\text{H NMR}$  (400 MHz,  $\text{CDCl}_3$ ):  $\delta$  7.93-7.82 (m, 3H), 7.52-7.39 (m, 6H), 7.04-7.02 (m, 2H), 3.88 (s, 3H) ppm. Data is consistent with that reported in the literature.<sup>20</sup>

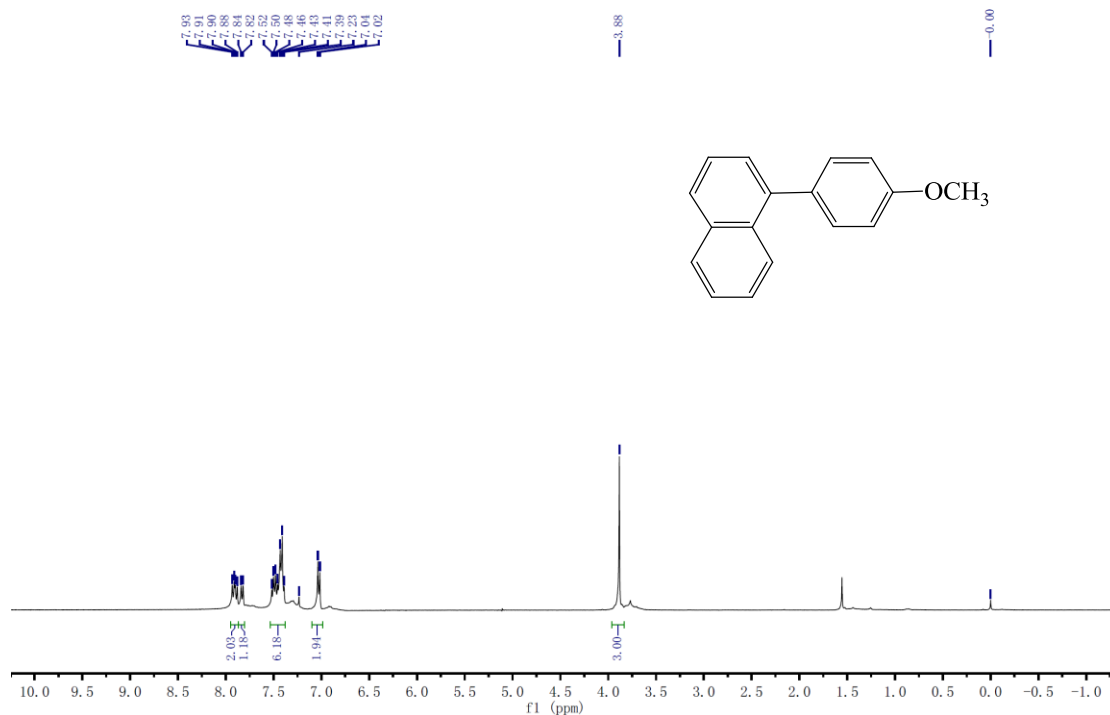

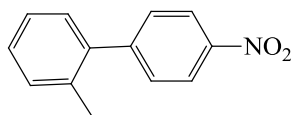

### 1-methyl-4'-nitro-1,1'-biphenyl

White solid, m.p. 99-101°C.  $^1\text{H NMR}$  (400 MHz,  $\text{CDCl}_3$ ):  $\delta$  8.28 (d,  $J = 8.0$  Hz, 2H), 7.50 (d,  $J = 12.0$  Hz, 2H), 7.33-7.21 (m, 4H), 2.27 (s, 3H) ppm. Data is consistent with that reported in the literature.<sup>20</sup>

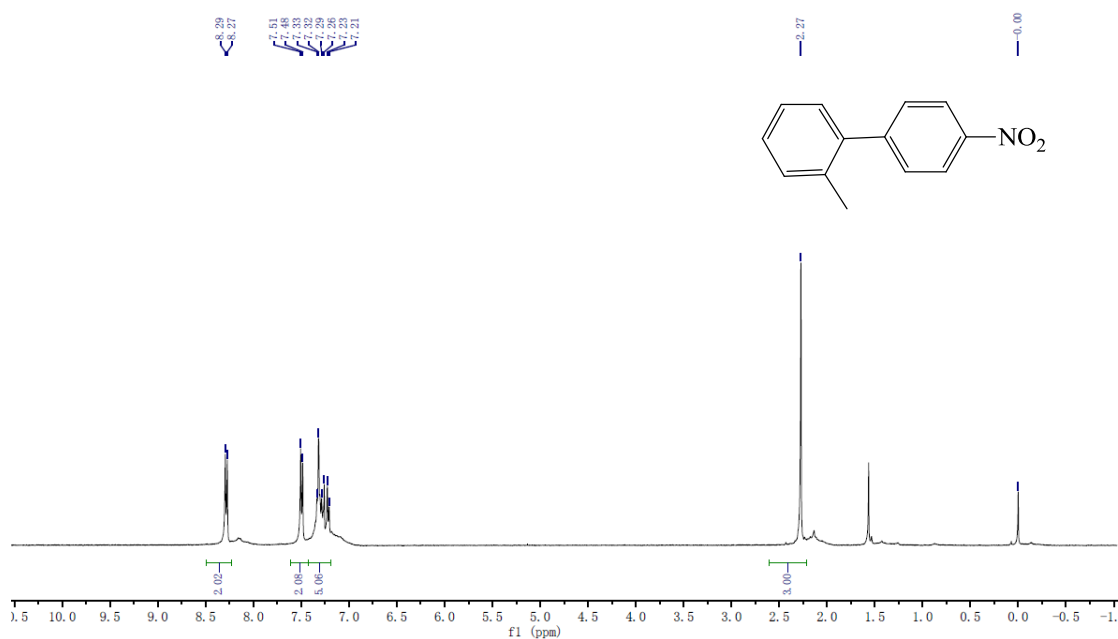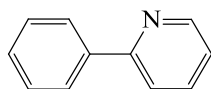

### 2-phenylpyridine

Yellow oil.  $^1\text{H NMR}$  (400 MHz,  $\text{CDCl}_3$ ):  $\delta$  8.69 (d,  $J = 4.0$  Hz, 1H), 8.98 (d,  $J = 4.0$  Hz, 2H), 7.77-7.72 (m, 2H), 7.48 (t,  $J = 8.0$  Hz, 2H), 7.41 (t,  $J = 6.0$  Hz, 1H), 7.23 (d,  $J = 4.0$  Hz, 1H) ppm. Data is consistent with that reported in the literature.<sup>19</sup>



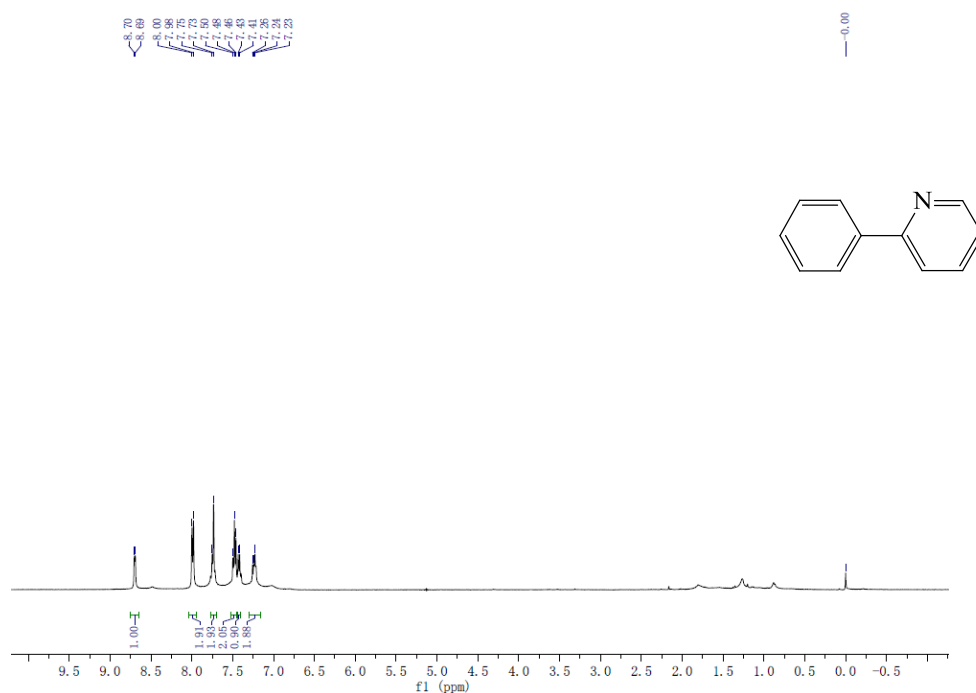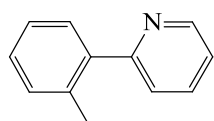

### 2-(*o*-tolyl)pyridine

Yellow oil. <sup>1</sup>H NMR (400 MHz, CDCl<sub>3</sub>): δ 8.69 (d, *J* = 4.0 Hz, 1H), 7.76-7.73 (m, 1H), 7.40 (d, *J* = 8.0 Hz, 2H), 7.30-7.23 (m, 4H), 2.36 (s, 3H) ppm. Data is consistent with that reported in the literature.<sup>19</sup>

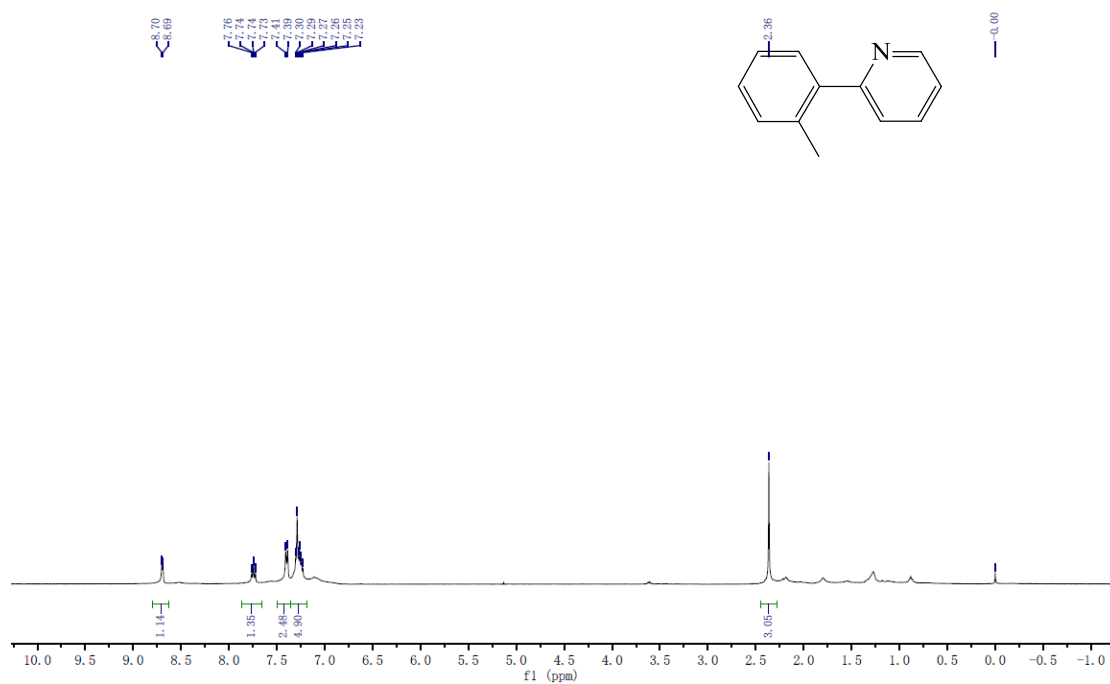

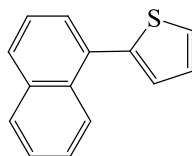

### 2-(naphthalen-1-yl)thiophene

Colorless oil.  $^1\text{H NMR}$  (400 MHz,  $\text{CDCl}_3$ ):  $\delta$  8.22 (d,  $J = 8.0$  Hz, 1H), 7.90-7.84 (m, 2H), 7.57 (d,  $J = 8.0$  Hz, 1H), 7.51-7.42 (m, 4H), 7.30-7.24 (m, 1H), 7.18 (d,  $J = 8.0$  Hz, 1H) ppm. Data is consistent with that reported in the literature.<sup>21</sup>

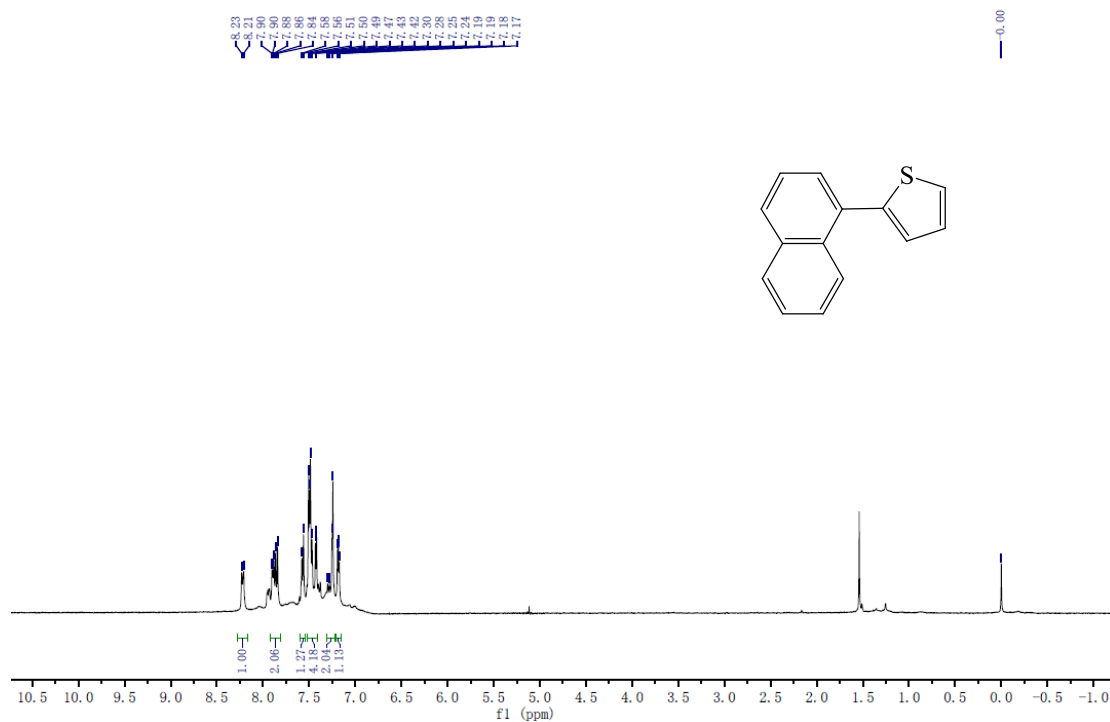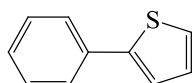

### 2-phenylthiophene

Colorless oil.  $^1\text{H NMR}$  (400 MHz,  $\text{CDCl}_3$ ):  $\delta$  7.62-7.59 (m, 2H), 7.39-7.27 (m, 5H), 7.09 (d,  $J = 4.0$  Hz, 1H) ppm. Data is consistent with that reported in the literature.<sup>22</sup>

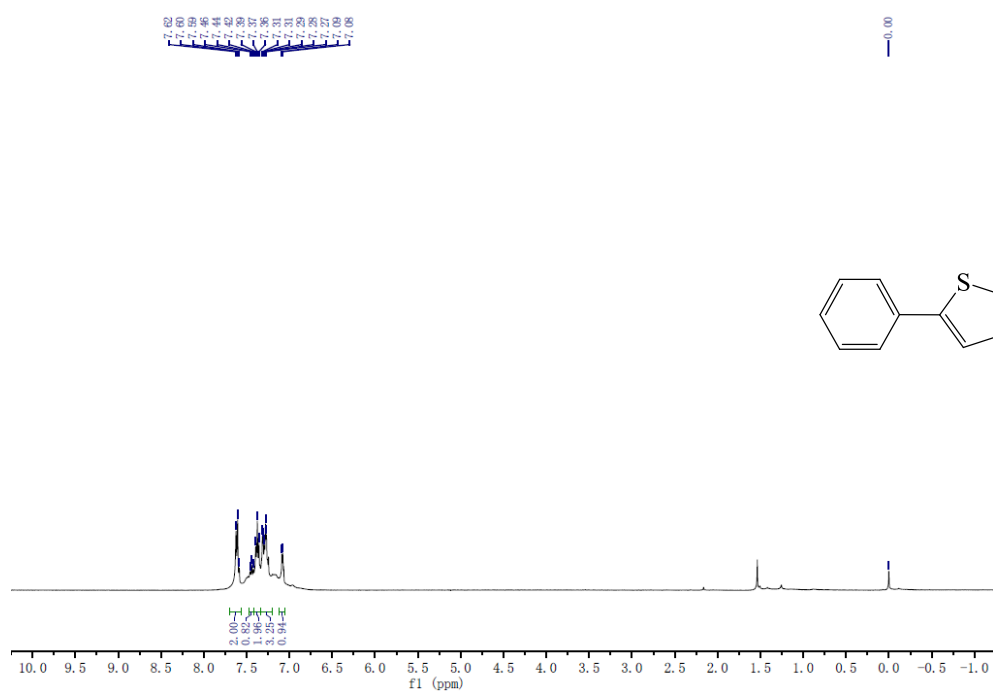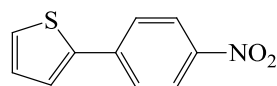

### 2-(4-nitrophenyl)thiophene

Yellow solid, m.p. 135-136°C. <sup>1</sup>H NMR (400 MHz, CDCl<sub>3</sub>): δ 8.23 (d, *J* = 12.0 Hz, 2H), 7.74 (d, *J* = 8.0 Hz, 2H), 7.47 (d, *J* = 4.0 Hz, 1H), 7.44 (d, *J* = 8.0 Hz, 1H), 7.15 (t, *J* = 4.0 Hz, 1H) ppm. Data is consistent with that reported in the literature.<sup>23</sup>

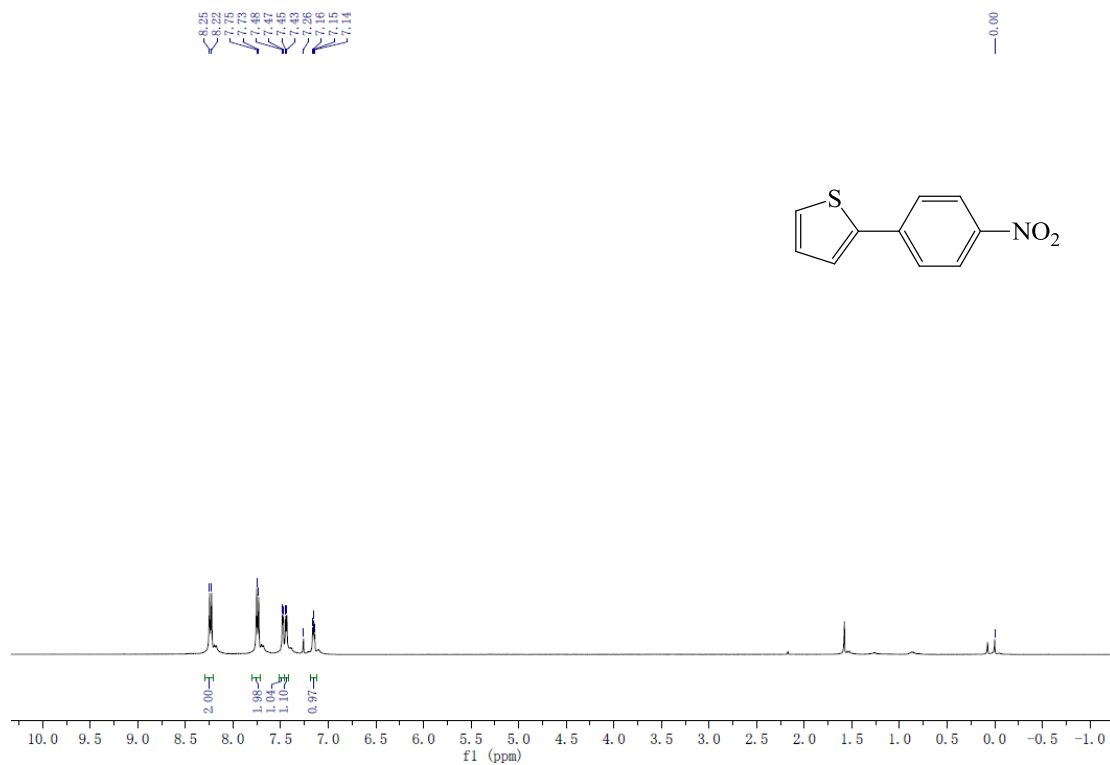

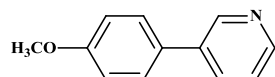

### 3-(4-methoxyphenyl)pyridine

White solid, m.p. 58-60°C.  $^1\text{H NMR}$  (400 MHz,  $\text{CDCl}_3$ ):  $\delta$  8.81 (s, 1H), 8.54 (d,  $J = 4.0$  Hz, 1H), 7.83 (d,  $J = 8.0$  Hz, 1H), 7.52 (d,  $J = 8.0$  Hz, 2H), 7.35-7.32 (m, 1H), 7.02 (d,  $J = 8.0$  Hz, 2H), 3.86 (s, 3H) ppm. Data is consistent with that reported in the literature.<sup>24</sup>

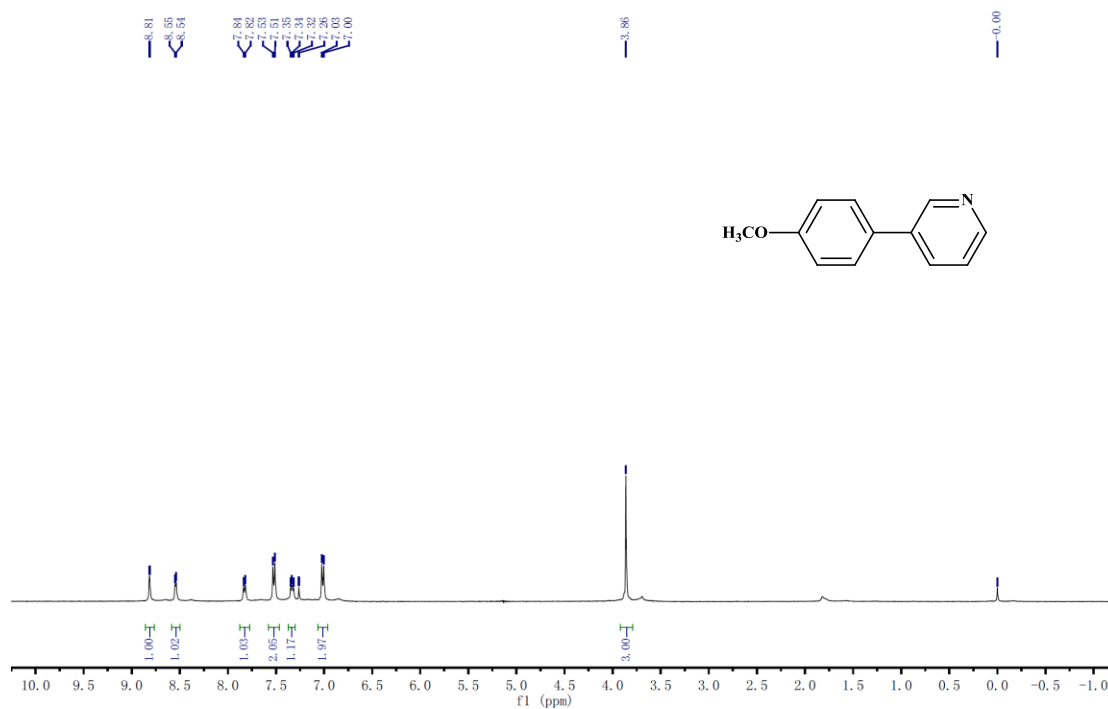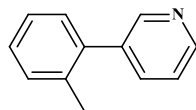

### 3-(*o*-tolyl)pyridine

Colorless oil.  $^1\text{H NMR}$  (400 MHz,  $\text{CDCl}_3$ ):  $\delta$  8.60 (s, 2H), 7.65 (d,  $J = 8.0$  Hz, 1H), 7.35-7.21 (m, 5H), 2.28 (s, 3H) ppm. Data is consistent with that reported in the literature.<sup>19</sup>

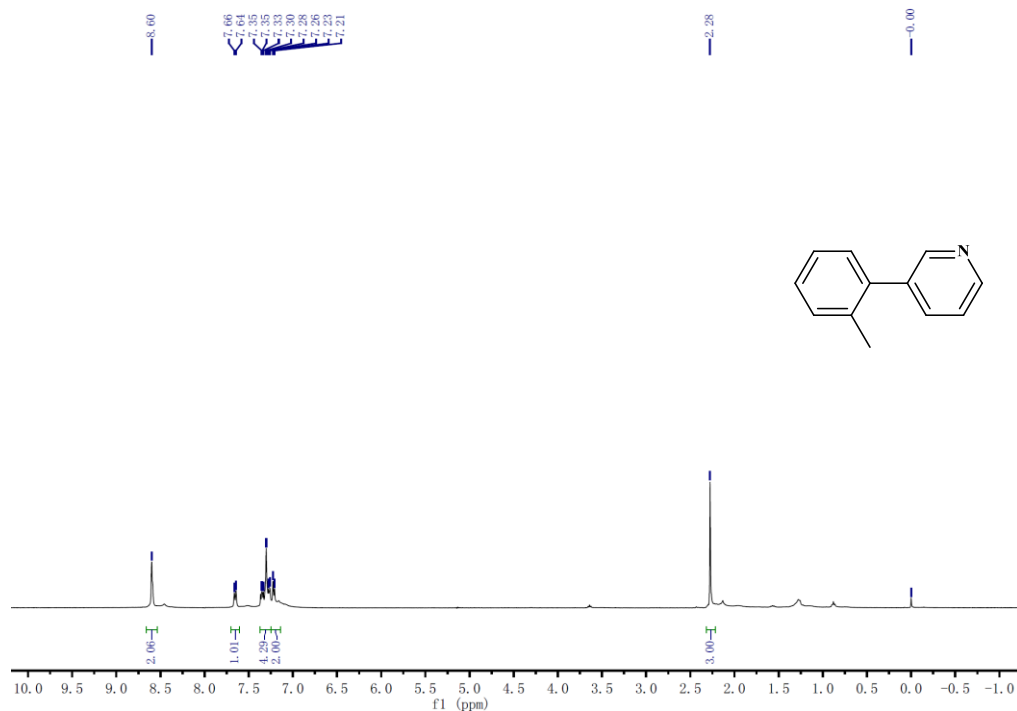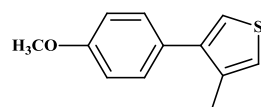

### 3-(4-methoxyphenyl)-4-methylthiophene

Colorless oil. <sup>1</sup>H NMR (400 MHz, CDCl<sub>3</sub>): δ 7.31 (d, *J* = 8.0 Hz, 2H), 7.13 (s, 1H), 7.00 (s, 1H), 7.94 (d, *J* = 8.0 Hz, 2H), 3.84 (s, 3H), 2.25 (s, 3H) ppm. <sup>13</sup>C NMR (100.6 MHz, CDCl<sub>3</sub>): δ 158.69, 142.75, 136.19, 129.68, 129.57, 122.24, 121.79, 113.72, 55.27, 15.55 ppm.

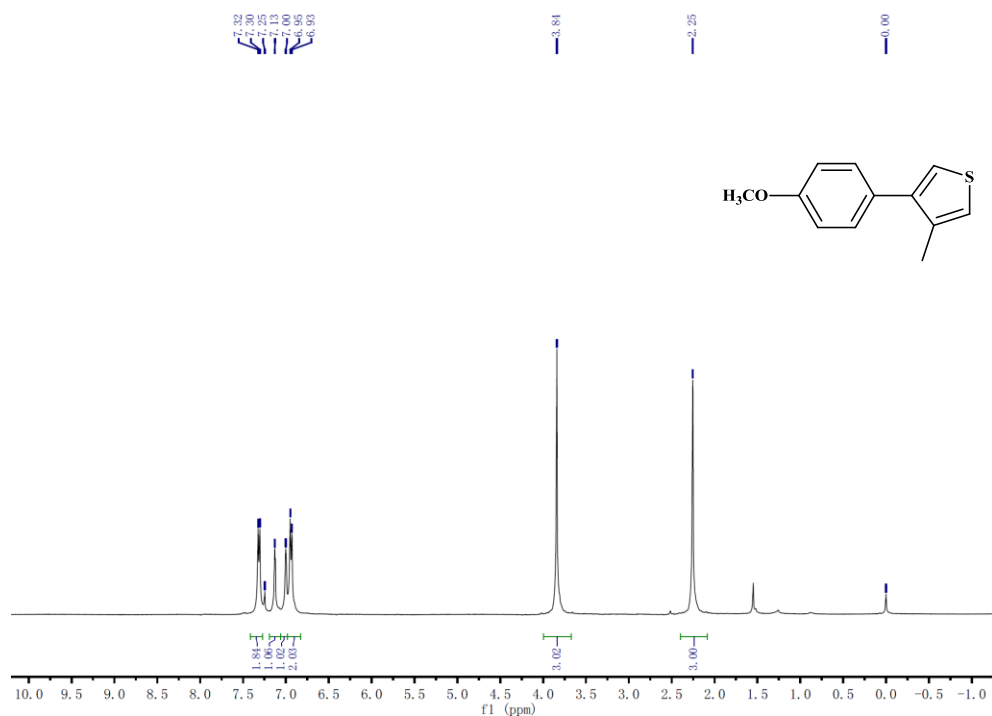

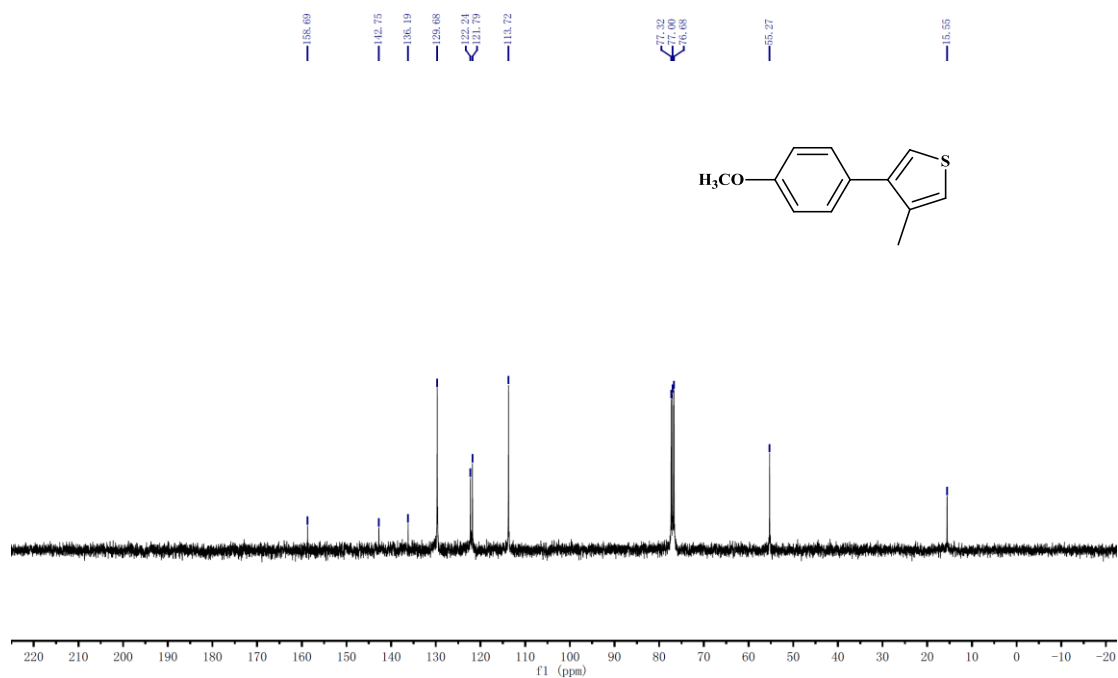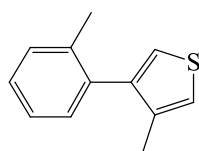

### 3-methyl-4-(*o*-tolyl)thiophene

Colorless oil. <sup>1</sup>H NMR (400 MHz, CDCl<sub>3</sub>): δ 7.24 (t, *J* = 8.0 Hz, 1H), 7.19 (d, *J* = 4.0 Hz, 1H), 7.14 (d, *J* = 8.0 Hz, 2H), 7.03 (d, *J* = 4.0 Hz, 1H), 7.01 (s, 1H), 2.13 (s, 3H), 2.01 (s, 3H) ppm. <sup>13</sup>C NMR (100.6 MHz, CDCl<sub>3</sub>): δ 142.71, 136.96, 136.86, 136.77, 130.01, 129.85, 127.44, 125.40, 122.56, 120.86, 19.91, 14.72 ppm.

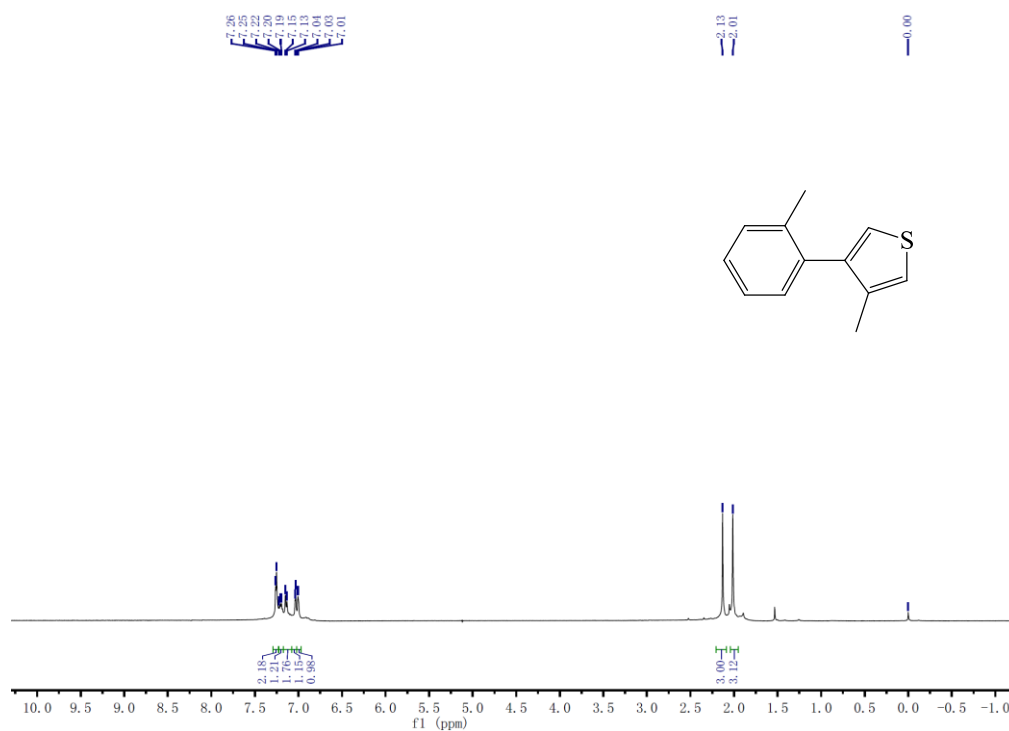

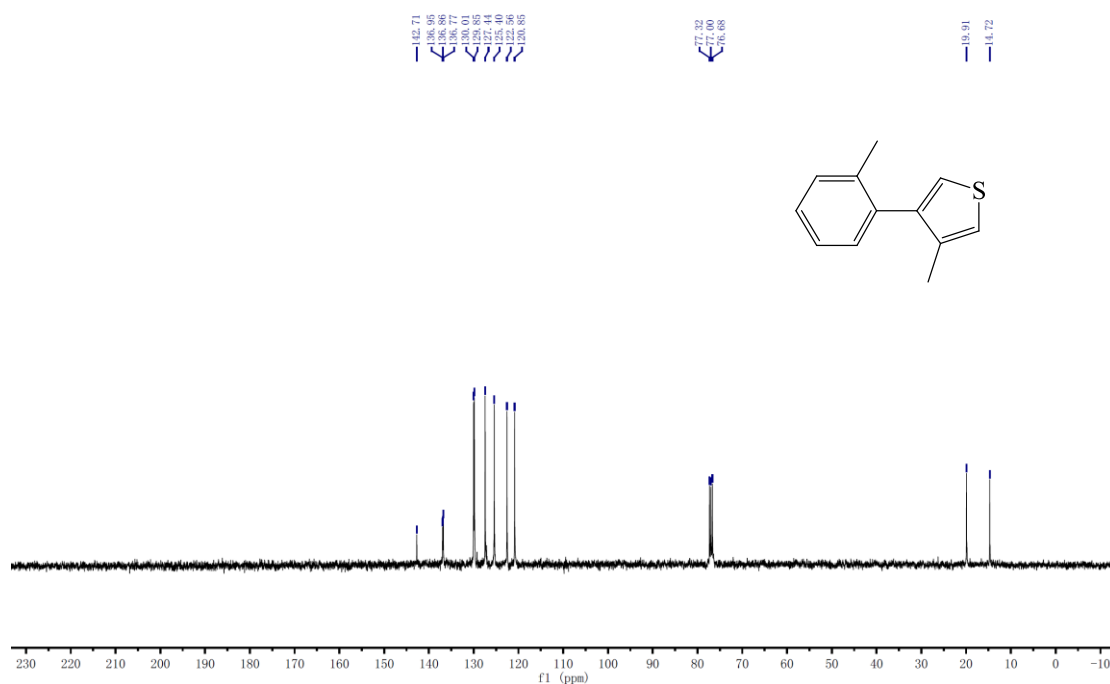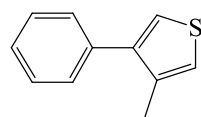

### 3-methyl-4-phenylthiophene

Colorless oil. <sup>1</sup>H NMR (400 MHz, CDCl<sub>3</sub>): δ 7.40-7.34 (m, 5H), 7.19 (d, *J* = 4.0 Hz, 1H), 7.02 (br, 1H), 2.27 (s, 3H) ppm. Data is consistent with that reported in the literature.<sup>25</sup>

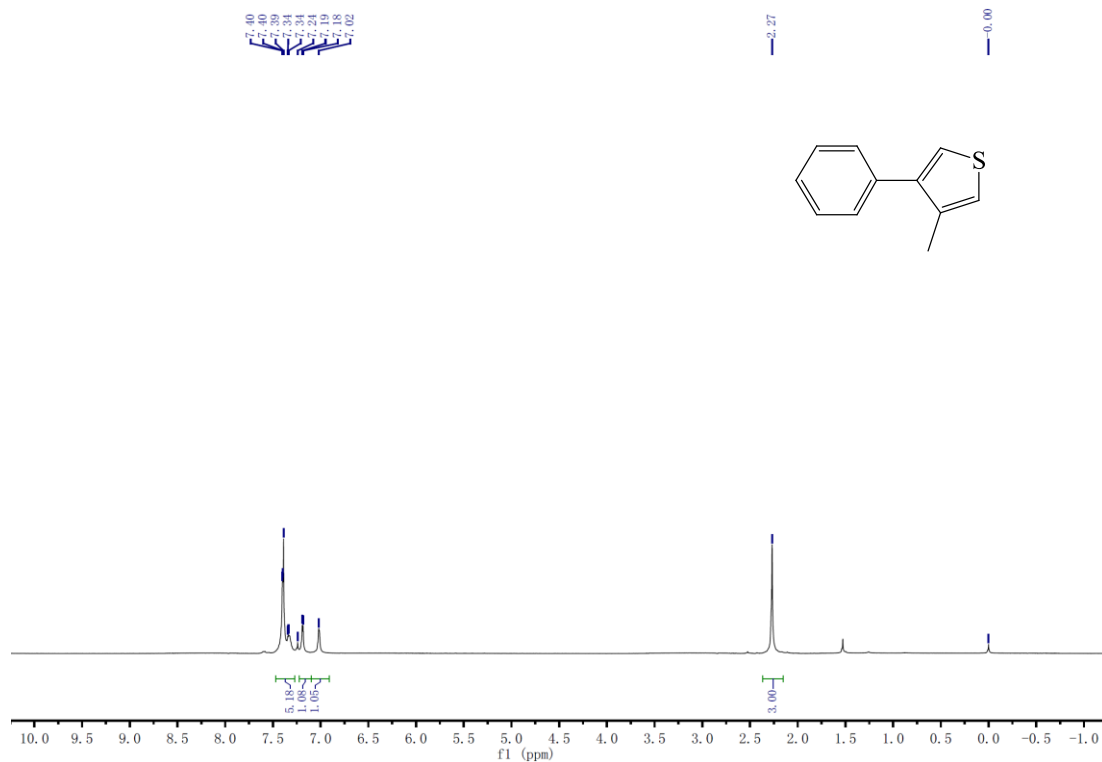

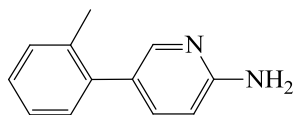

### 5-(*o*-tolyl)pyridin-2-amine

Light orange oil.  $^1\text{H NMR}$  (400 MHz,  $\text{CDCl}_3$ ):  $\delta$  8.05 (s, 1H), 7.43 (d,  $J = 8.0$  Hz, 1H), 7.25-7.19 (m, 4H), 6.56 (d,  $J = 8.0$  Hz, 1H), 4.52 (br, 2H), 2.28 (s, 3H) ppm.

Data is consistent with that reported in the literature.<sup>26</sup>

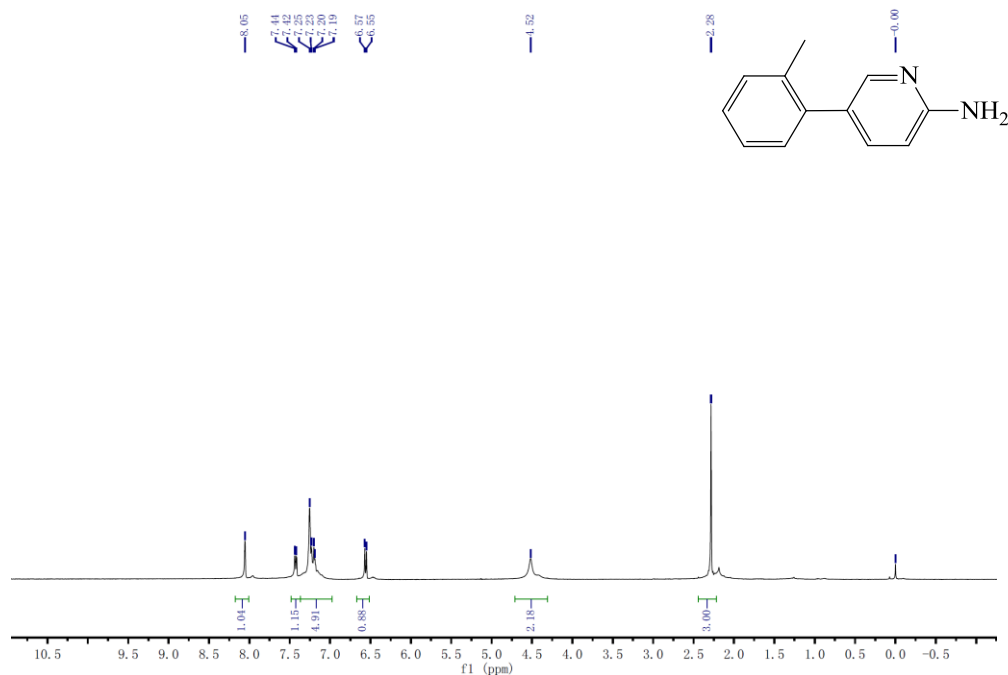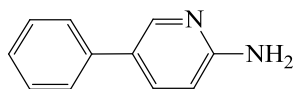

### 5-phenylpyridin-2-amine

Light yellow solid, m.p. 130-131°C.  $^1\text{H NMR}$  (400 MHz,  $\text{CDCl}_3$ ):  $\delta$  8.33 (s, 1H), 7.68 (d,  $J = 8.0$  Hz, 1H), 7.51 (d,  $J = 8.0$  Hz, 2H), 7.42 (t,  $J = 6.0$  Hz, 2H), 7.32 (d,  $J = 8.0$  Hz, 1H), 6.58 (d,  $J = 8.0$  Hz, 1H), 4.51 (br, 2H) ppm. Data is consistent with that reported in the literature.<sup>27</sup>



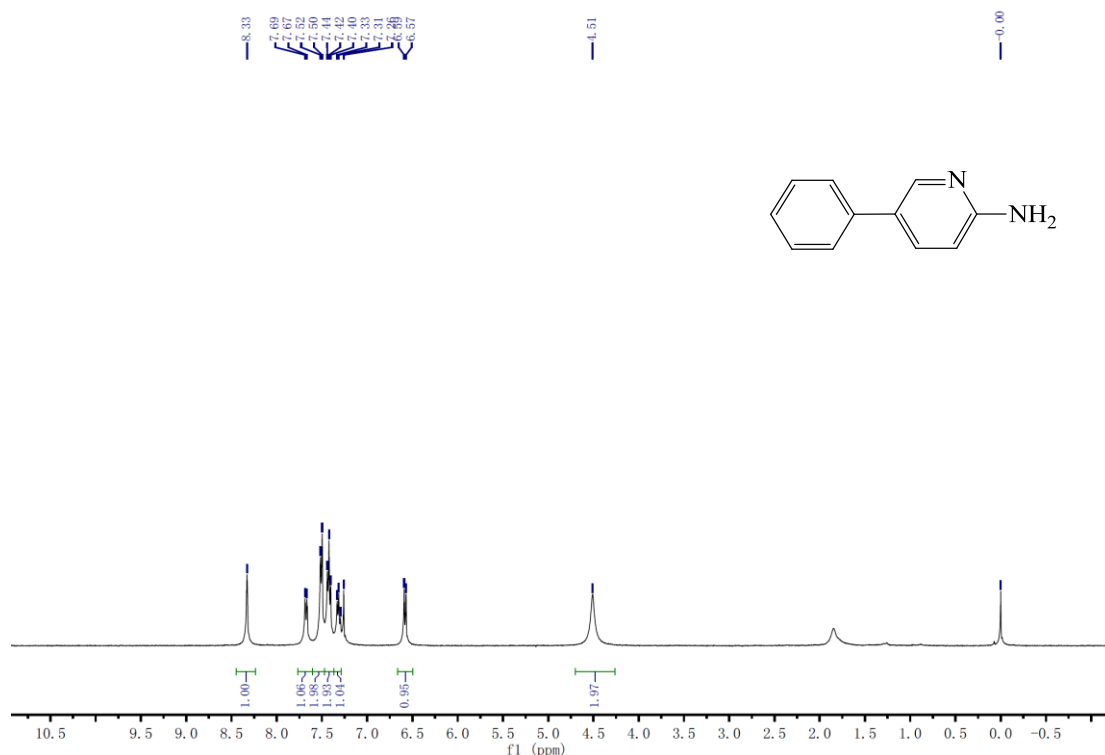

#### References:

- 1 N. Liu and Z. X. Wang, *J. Org. Chem.*, 2011, **76**, 10031.
- 2 P. Leowanawat, N. Zhang, A. M. Resmerita, B. M. Rosen and V. Percec, *J. Org. Chem.*, 2011, **76**, 9946.
- 3 Y. Monguchi, Y. Fujita, S. Hashimoto, M. Ina, T. Takahashi, R. Ito, K. Nozaki, T. Maegawa and H. Sajiki, *Tetrahedron*, 2011, **67**, 8628.
- 4 O. Ibarguren, C. Zakri, E. Fouquet and F. X. Felpin, *Tetrahedron Lett.*, 2009, **50**, 5071.
- 5 Z. Wang, Q. Ding, X. He and J. Wu, *Tetrahedron*, 2009, **65**, 4635.
- 6 W. J. Zhou, K. X. Wang, J. X. Wang and Z. R. Gao, *Tetrahedron*, 2010, **66**, 7633.
- 7 Y. Fei, L. Zhou, Q. Xiao, Y. Zhang and J. Wang, *Org. Lett.*, 2011, **13**, 5020.
- 8 M. L. N. Rao, D. Banerjee and R. J. Dhanorkar, *Tetrahedron Lett.*, 2010, **51**, 6101.
- 9 A. Pal, R. Ghosh, N. N. Adarsh and A. Sarkar, *Tetrahedron*, 2010, **66**, 5451.
- 10 J. J. Hirner and S. A. Blum, *Organometallics*, 2011, **30**, 1299.
- 11 L. H. Heitman, J. P. D. Van Veldhoven, A. M. Zweemer, K. Ye, J. Brussee and A. P. Jzerman, *J. Med. Chem.*, 2008, **51**, 4724.
- 12 Y. Tohda, M. Eiraku, T. Nakagawa, Y. Usami, M. Ariga, T. Kawashima, K. Tani, H. Watanabe and Y. Mori, *Bull. Chem. Soc. Jpn.*, 1990, **63**, 2820.
- 13 E. D. Anderson and D. Boger, *Org. Lett.*, 2011, **13**, 2492.
- 14 S. Lin, Z. Liu and Y. Hu, *J. Comb. Chem.*, 2007, **9**, 742.
- 15 N. Dias, U. Jacquemard, B. Baldeyrou, A. Lansiaux, J. F. Goossens, C. Bailly, S. Routier and J. Y. M  rour, *Eur. J. Med. Chem.*, 2005, **40**, 1206.
- 16 B. Basu, K. Biswas, S. Kundu and S. Ghosh, *Green Chem.*, 2010, **12**, 1734.
- 17 Q. Du, W. Zhang, H. Ma, J. Zheng, B. Zhou and Y. Li, *Tetrahedron*, 2012, **68**,

- 3577.
- 18 P. Mao, L. Yang, Y. Xiao, J. Yuan, X. Liu and M. Song, *J. Organomet. Chem.*, 2012, **705**, 39.
- 19 W. -C. Chen, Y. -C. Hsu, W. -C. Shih, C. -Y. Lee, W. -H. Chuang, Y. -F. Tsai, P. P. -Y. Chen and T.-G. Ong, *Chem. Commun.*, 2012, **48**, 6702.
- 20 L. Marciasini, N. Richey, M. Vaultier and M. Pucheault, *Chem. Commun.*, 2012, **48**, 1553.
- 21 G. A. Molander and F. Beaumard, *Org. Lett.*, 2012, **12**, 4022.
- 22 M. -T. Chen, D. A. Vicic, M. L. Turner and O. Navarro, *Organometallics*, 2011, **30**, 5052.
- 23 D. P. Hari, P. Schroll and B. König, *J. Am. Chem. Soc.*, 2012, **134**, 2958.
- 24 Z. -Y. Wang, G. -Q. Chen and L. -X. Shao, *J. Org. Chem.*, 2012, **77**, 6608.
- 25 J. K. Yano, T. T. Denton, M. A. Cerny, X. Zhang, E. F. Johnson and J. R. Cashman, *J. Med. Chem.*, 2006, **49**, 6987.
- 26 S. Zhu, S. Shi, S. W. Gerritz and M. J. Sofia, *J. Comb. Chem.*, 2003, **5**, 205.
- 27 I. Stoll, A. Mix, A. B. Rozhenko, B. Neumann, H.-G. Stammer and J. Mattay, *Tetrahedron.*, 2008, **64**, 3813.
